# Supplementary material for: P-Heterocyclic carbenes as effective catalysts for the activation of single and multiple bonds. A theoretical study
Source: Royal Society of Chemistry journal article supplement (doi:10.1039/c0nj00208a), 2010-01-01
Supplement: c0nj00208a.pdf [file c0nj00208a.pdf]

Supporting Information for

**P-Heterocyclic Carbenes as Effective Catalysts for the Activation of Single and  
Multiple Bonds. A Theoretical Study**

**Markus Rullich, Ralf Tonner, and Gernot Frenking**

**Table S1.** Coordinates and energies of the calculated molecules at B3LYP/def-TZVP

| <b>H2</b> B3LYP/TZVP |           |          |           |
|----------------------|-----------|----------|-----------|
| 2                    |           |          |           |
| E(SCF)=              | -1,179649 |          |           |
| H                    | 0,000000  | 0,000000 | 0,371893  |
| H                    | 0,000000  | 0,000000 | -0,371893 |

  

| <b>1N</b> B3LYP/TZVP |             |           |           | <b>1N H2 TS</b> B3LYP/TZVP |             |           |           | <b>1N H2 Product</b> B3LYP/TZVP |             |           |           |
|----------------------|-------------|-----------|-----------|----------------------------|-------------|-----------|-----------|---------------------------------|-------------|-----------|-----------|
| 12                   |             |           |           | 14                         |             |           |           | 14                              |             |           |           |
| E(SCF)=              | -211,393483 |           |           | E(SCF)=                    | -212,537268 |           |           | E(SCF)=                         | -212,658715 |           |           |
| C                    | 0,085575    | 0,118916  | -1,238463 | C                          | 1,481465    | -0,040993 | 0,796639  | C                               | 1,441863    | 0,182547  | 0,886217  |
| C                    | -0,879063   | 0,375513  | -0,074658 | C                          | 1,366723    | 0,643817  | -0,584898 | C                               | 1,464214    | 0,456488  | -0,644011 |
| N                    | -0,199926   | -0,348680 | 1,039375  | C                          | 0,091496    | 0,026810  | -1,195138 | C                               | 0,021250    | 0,181127  | -1,106369 |
| C                    | 0,794614    | -1,153576 | 0,773091  | N                          | -0,598074   | -0,508089 | -0,006548 | N                               | -0,468343   | -0,764462 | -0,100689 |
| C                    | 0,957057    | -1,064995 | -0,730486 | C                          | 0,061454    | -0,399059 | 1,149881  | C                               | -0,012521   | -0,227262 | 1,183212  |
| H                    | -0,550712   | -0,244589 | 1,982352  | H                          | -1,560656   | -0,802401 | -0,050770 | H                               | -1,472907   | -0,890279 | -0,137904 |
| H                    | -1,000785   | 1,430455  | 0,175538  | H                          | -0,530148   | 0,766040  | -1,708054 | H                               | -0,552891   | 1,122924  | -1,115868 |
| H                    | -1,870633   | -0,055459 | -0,238501 | H                          | 0,312518    | -0,780857 | -1,899118 | H                               | -0,030053   | -0,252769 | -2,106574 |
| H                    | 0,707104    | 0,998125  | -1,414702 | H                          | 1,226869    | 1,716366  | -0,443059 | H                               | 1,772892    | 1,474920  | -0,882420 |
| H                    | -0,440998   | -0,104241 | -2,165726 | H                          | 2,239719    | 0,491784  | -1,219644 | H                               | 2,158148    | -0,221426 | -1,141676 |
| H                    | 2,009742    | -0,974637 | -1,002654 | H                          | 1,954639    | 0,581907  | 1,552146  | H                               | 1,739217    | 1,053315  | 1,471618  |
| H                    | 0,626702    | -2,028198 | -1,137206 | H                          | 2,048676    | -0,975480 | 0,715417  | H                               | 2,124115    | -0,630001 | 1,137308  |
|                      |             |           |           | H                          | -0,405640   | 1,204820  | 2,049620  | H                               | -0,590760   | 0,656778  | 1,500886  |
|                      |             |           |           | H                          | -0,425898   | 0,094031  | 2,107894  | H                               | -0,091021   | -0,979525 | 1,970155  |

  

| <b>1P</b> B3LYP/TZVP |             |           |           | <b>1P H2 TS</b> B3LYP/TZVP |             |           |           | <b>1P H2 Product</b> B3LYP/TZVP |             |           |           |
|----------------------|-------------|-----------|-----------|----------------------------|-------------|-----------|-----------|---------------------------------|-------------|-----------|-----------|
| 12                   |             |           |           | 14                         |             |           |           | 14                              |             |           |           |
| E(SCF)=              | -497,937017 |           |           | E(SCF)=                    | -499,111796 |           |           | E(SCF)=                         | -499,272993 |           |           |
| C                    | 0,986923    | -1,109263 | -0,846778 | C                          | 0,185494    | 0,075870  | -1,424397 | C                               | 0,003133    | -1,387609 | -0,009989 |
| C                    | 0,099152    | 0,101947  | -1,264092 | P                          | -1,178039   | 0,363137  | -0,132522 | P                               | 1,372803    | -0,062285 | 0,004221  |
| C                    | -0,921058   | 0,419195  | -0,144114 | C                          | -0,055032   | 0,272625  | 1,303770  | C                               | 0,101183    | 1,325148  | 0,170233  |
| P                    | -0,213100   | -0,506704 | 1,341480  | C                          | 1,338003    | 0,206123  | 0,761123  | C                               | -1,233899   | 0,757583  | -0,322299 |
| C                    | 1,233663    | -1,173611 | 0,632619  | C                          | 1,438933    | 0,620208  | -0,721670 | C                               | -1,339763   | -0,668254 | 0,230906  |
| H                    | 0,217261    | 0,407639  | 2,328617  | H                          | -1,714713   | -0,941242 | 0,045995  | H                               | 1,508315    | 0,041314  | -1,414286 |
| H                    | -1,034140   | 1,487548  | 0,036581  | H                          | -0,035978   | 0,605443  | -2,350277 | H                               | 0,204523    | -2,134672 | 0,757549  |
| H                    | -1,909017   | 0,013006  | -0,363176 | H                          | 0,288129    | -0,986613 | -1,652171 | H                               | 0,016441    | -1,898720 | -0,972944 |
| H                    | 0,754137    | 0,965638  | -1,400187 | H                          | 1,453827    | 1,713113  | -0,782062 | H                               | -1,536927   | -0,617664 | 1,306165  |
| H                    | -0,400779   | -0,073933 | -2,219298 | H                          | 2,356472    | 0,255893  | -1,190851 | H                               | -2,172006   | -1,216985 | -0,217103 |
| H                    | 1,931455    | -1,119694 | -1,397791 | H                          | 2,079454    | 0,682665  | 1,407055  | H                               | -2,081600   | 1,373662  | -0,007979 |
| H                    | 0,514081    | -2,072606 | -1,103786 | H                          | 1,532832    | -0,878201 | 0,838901  | H                               | -1,239871   | 0,732568  | -1,416647 |
|                      |             |           |           | H                          | -0,011788   | 2,277387  | 1,799319  | H                               | 0,038442    | 1,598784  | 1,226464  |
|                      |             |           |           | H                          | -0,163976   | 1,549039  | 2,119280  | H                               | 0,426138    | 2,210821  | -0,376988 |

  

| <b>2N</b> B3LYP/TZVP |             |  |  | <b>2N H2 TS</b> B3LYP/TZVP |             |  |  | <b>2N H2 Product</b> B3LYP/TZVP |             |  |  |
|----------------------|-------------|--|--|----------------------------|-------------|--|--|---------------------------------|-------------|--|--|
| 10                   |             |  |  | 12                         |             |  |  | 12                              |             |  |  |
| E(SCF)=              | -210,163156 |  |  | E(SCF)=                    | -211,304894 |  |  | E(SCF)=                         | -211,433988 |  |  |

|   |           |           |           |   |           |           |           |   |           |           |           |
|---|-----------|-----------|-----------|---|-----------|-----------|-----------|---|-----------|-----------|-----------|
| C | 0,048451  | 0,079805  | -1,211806 | C | 1,442011  | -0,213318 | -0,494873 | C | 1,202172  | -0,051698 | 0,056176  |
| C | -0,921072 | 0,151554  | -0,059304 | C | 0,149477  | 0,197716  | -1,172129 | C | 0,319518  | 1,205401  | -0,124199 |
| C | -0,25836  | -0,240715 | 1,026254  | C | -0,856233 | 0,242622  | -0,039491 | C | -1,069648 | 0,646728  | 0,107440  |
| N | 1,08379   | -0,560466 | 0,633945  | C | -0,275015 | -0,285392 | 1,039699  | C | -1,015106 | -0,685116 | 0,028803  |
| C | 1,371151  | -0,408522 | -0,65009  | N | 1,063142  | -0,626605 | 0,741081  | N | 0,276291  | -1,169524 | -0,233331 |
| H | 1,768064  | -0,882623 | 1,304152  | H | 1,713266  | -0,958213 | 1,434521  | H | 0,512725  | -2,048306 | 0,205912  |
| H | -0,571348 | -0,337955 | 2,055     | H | -0,679920 | -0,493361 | 2,018392  | H | -1,836865 | -1,386230 | 0,081842  |
| H | -1,953665 | 0,460834  | -0,10125  | H | -1,883331 | 0,559417  | -0,121169 | H | -1,967242 | 1,238830  | 0,193475  |
| H | 0,205143  | 1,044864  | -1,707716 | H | 0,239432  | 1,113483  | -1,749677 | H | 0,600002  | 2,004038  | 0,565227  |
| H | -0,274563 | -0,60072  | -2,008324 | H | -0,130143 | -0,603168 | -1,873843 | H | 0,413527  | 1,607792  | -1,140512 |
|   |           |           |           | H | 2,407174  | 0,462735  | -0,622075 | H | 2,062909  | -0,072913 | -0,612218 |
|   |           |           |           | H | 2,218107  | 1,479892  | -0,275517 | H | 1,562882  | -0,108640 | 1,091406  |

| 2P B3LYP/TZVP      |           |           |           | 2P H2 TS B3LYP/TZVP |           |           | 2P H2 Product B3LYP/TZVP |   |           |           |           |
|--------------------|-----------|-----------|-----------|---------------------|-----------|-----------|--------------------------|---|-----------|-----------|-----------|
| 10                 |           |           |           | 12                  |           |           | 12                       |   |           |           |           |
| E(SCF)= -496,70968 |           |           |           | E(SCF)= -497,877962 |           |           | E(SCF)= -498,040004      |   |           |           |           |
| C                  | -1,165143 | -0,808671 | 0,003445  | C                   | -0,112350 | 1,346381  | 0,184948                 | C | -0,060289 | 1,330990  | 0,082546  |
| C                  | -1,240541 | 0,706846  | -0,017012 | C                   | -1,247337 | 0,714164  | -0,111219                | P | -1,337774 | 0,008721  | -0,046261 |
| C                  | -0,060509 | 1,334495  | 0,007485  | C                   | -1,169868 | -0,796943 | -0,101578                | C | 0,020136  | -1,293708 | 0,223265  |
| P                  | 1,199852  | 0,043287  | 0,307614  | C                   | 0,233442  | -1,312405 | 0,065695                 | C | 1,369073  | -0,616429 | -0,121831 |
| C                  | 0,233011  | -1,365635 | -0,002351 | P                   | 1,305039  | 0,161684  | 0,283831                 | C | 1,187682  | 0,875274  | -0,005926 |
| H                  | 2,311241  | 0,103678  | -0,559601 | H                   | 1,433866  | -0,037528 | 1,690857                 | H | -1,846444 | 0,073582  | 1,288993  |
| H                  | 0,086051  | 2,405362  | 0,025007  | H                   | -0,009800 | 2,422314  | 0,243168                 | H | -0,314033 | 2,383337  | 0,115899  |
| H                  | -2,19435  | 1,223072  | -0,046965 | H                   | -2,188716 | 1,220887  | -0,300513                | H | 2,052935  | 1,530337  | -0,040987 |
| H                  | -1,665661 | -1,230124 | -0,881658 | H                   | -1,708157 | -1,282994 | -0,919398                | H | 2,173986  | -0,974195 | 0,527349  |
| H                  | -1,731584 | -1,252472 | 0,835125  | H                   | -1,672944 | -1,171718 | 0,808332                 | H | 1,673931  | -0,867809 | -1,144535 |
|                    |           |           |           | H                   | 0,636701  | -1,989297 | -1,264118                | H | -0,165474 | -2,168580 | -0,398022 |
|                    |           |           |           | H                   | 0,642266  | -1,584744 | -1,958004                | H | 0,006301  | -1,614829 | 1,264177  |

| 3N B3LYP/TZVP        |           |           |           | 3N H2 TS B3LYP/TZVP |           |           | 3N H2 Product B3LYP/TZVP |   |           |           |           |
|----------------------|-----------|-----------|-----------|---------------------|-----------|-----------|--------------------------|---|-----------|-----------|-----------|
| 11                   |           |           |           | 13                  |           |           | 13                       |   |           |           |           |
| E(SCF)= -227,4595572 |           |           |           | E(SCF)= -228,583358 |           |           | E(SCF)=                  |   |           |           |           |
| C                    | -0,766564 | 0,932843  | -0,071340 | N                   | -0,239623 | -1,145226 | -0,172267                | N | -0,426338 | 1,187082  | -0,134264 |
| C                    | 0,765625  | 0,933489  | 0,071441  | C                   | 1,123018  | -0,632587 | 0,046577                 | C | 0,979827  | 0,787863  | 0,061827  |
| N                    | 1,062425  | -0,509338 | -0,072868 | C                   | 0,882985  | 0,892107  | 0,168548                 | C | 0,984259  | -0,782728 | 0,061520  |
| C                    | 0,000639  | -1,330312 | 0,000114  | N                   | -0,506613 | 1,027680  | -0,307238                | N | -0,419667 | -1,189231 | -0,133880 |
| N                    | -1,061864 | -0,510362 | 0,072240  | C                   | -1,152053 | -0,155842 | -0,159184                | C | -1,187864 | -0,003176 | 0,264444  |
| H                    | 2,000331  | -0,864688 | -0,022231 | H                   | -1,017791 | 1,854071  | -0,039669                | H | -0,582341 | -1,369084 | -1,119018 |
| H                    | 1,259776  | 1,525757  | -0,699194 | H                   | 0,959705  | 1,217811  | 1,211662                 | H | 1,615233  | -1,207719 | -0,719806 |
| H                    | 1,083487  | 1,301930  | 1,051470  | H                   | 1,572020  | 1,473053  | -0,442814                | H | 1,346360  | -1,159977 | 1,020400  |
| H                    | -1,084832 | 1,301381  | -1,051177 | H                   | 1,563678  | -1,045859 | 0,956708                 | H | 1,608983  | 1,216961  | -0,718596 |
| H                    | -1,261397 | 1,524130  | 0,699614  | H                   | 1,765851  | -0,881899 | -0,799776                | H | 1,338566  | 1,166912  | 1,021312  |
| H                    | -1,999495 | -0,866732 | 0,024625  | H                   | -0,501696 | -2,070922 | 0,119748                 | H | -0,589962 | 1,365778  | -1,119358 |
|                      |           |           |           | H                   | -2,078689 | -0,101653 | 1,686651                 | H | -2,187529 | -0,006338 | -0,168966 |
|                      |           |           |           | H                   | -2,163132 | -0,243843 | 0,328381                 | H | -1,284604 | -0,003240 | 1,354295  |

| 3P B3LYP/TZVP |  |  |  | 3P H2 TS B3LYP/TZVP |  |  | 3P H2 Product B3LYP/TZVP |  |  |
|---------------|--|--|--|---------------------|--|--|--------------------------|--|--|
| 11            |  |  |  | 13                  |  |  | 13                       |  |  |

|         |            |           |           |         |             |           |           |         |              |           |           |
|---------|------------|-----------|-----------|---------|-------------|-----------|-----------|---------|--------------|-----------|-----------|
| E(SCF)= | -800,60366 |           |           | E(SCF)= | -801,761120 |           |           | E(SCF)= | -801,9207703 |           |           |
| C       | -0,000747  | -1,468789 | -0,000773 | C       | -0,009402   | -1,383176 | -0,047963 | C       | -0,000036    | -1,386796 | 0,000008  |
| P       | 1,367419   | -0,416711 | 0,181840  | P       | 1,491669    | -0,337676 | 0,026353  | P       | 1,570175     | -0,330902 | 0,006450  |
| C       | 0,717888   | 1,314286  | -0,271852 | C       | 0,681989    | 1,395370  | -0,101463 | C       | 0,689652     | 1,298847  | 0,329805  |
| C       | -0,715931  | 1,314893  | 0,271876  | C       | -0,759455   | 1,289694  | 0,420074  | C       | -0,689833    | 1,298803  | -0,329644 |
| P       | -1,368632  | -0,415405 | -0,181916 | P       | -1,398644   | -0,311750 | -0,344513 | P       | -1,570069    | -0,330993 | -0,006542 |
| H       | 2,351293   | -0,777955 | -0,775279 | H       | -2,409200   | -0,768487 | 0,543011  | H       | -1,643289    | -0,162606 | 1,410594  |
| H       | 1,334755   | 2,085546  | 0,187493  | H       | -0,783116   | 1,219213  | 1,510194  | H       | -0,597481    | 1,412972  | -1,412459 |
| H       | -2,345319  | -0,776984 | 0,781859  | H       | 1,864853    | -0,538365 | -1,331772 | H       | 1,643039     | -0,162030 | -1,410634 |
| H       | -0,725956  | 1,451563  | 1,355440  | H       | -0,076361   | -2,179387 | 1,106048  | H       | -0,009274    | -2,034258 | 0,876518  |
| H       | -1,331284  | 2,086878  | -0,188396 | H       | -0,063020   | -1,787289 | 1,851674  | H       | 0,009645     | -2,034885 | -0,875974 |
| H       | 0,727449   | 1,450345  | -1,355485 | H       | 1,262671    | 2,100343  | 0,494147  | H       | 1,323586     | 2,115497  | -0,026728 |
|         |            |           |           | H       | -1,361659   | 2,145851  | 0,112170  | H       | -1,323822    | 2,115621  | 0,026469  |
|         |            |           |           | H       | 0,691669    | 1,738191  | -1,136955 | H       | 0,597298     | 1,412979  | 1,412571  |

| 4N      | B3LYP/TZVP  |           |           | 4N H2 TS | B3LYP/TZVP  |           |           | 4N H2 Product | B3LYP/TZVP   |           |           |
|---------|-------------|-----------|-----------|----------|-------------|-----------|-----------|---------------|--------------|-----------|-----------|
| 9       |             |           |           | 11       |             |           |           | 11            |              |           |           |
| E(SCF)= | -226,254329 |           |           | E(SCF)=  | -227,367548 |           |           | E(SCF)=       | -227,4653488 |           |           |
| N       | 1,049511    | -0,401215 | 0,000100  | C        | -1,099665   | 0,000030  | -0,176724 | C             | 1,179450     | -0,000024 | 0,099224  |
| C       | 0,673571    | 0,938061  | -0,000026 | N        | -0,273781   | -1,079435 | -0,148350 | N             | 0,299541     | 1,146495  | -0,188052 |
| C       | -0,677361   | 0,935709  | 0,000193  | C        | 1,035852    | -0,674473 | 0,095710  | C             | -1,018497    | 0,666822  | 0,053183  |
| N       | -1,047782   | -0,405318 | 0,000137  | C        | 1,035925    | 0,674390  | 0,095717  | C             | -1,018528    | -0,666780 | 0,053172  |
| C       | 0,002516    | -1,274405 | -0,000622 | N        | -0,273673   | 1,079457  | -0,148415 | N             | 0,299493     | -1,146510 | -0,188046 |
| H       | -1,999783   | -0,728837 | 0,000139  | H        | -0,617660   | 2,016632  | -0,030701 | H             | 0,547685     | -1,979423 | 0,328272  |
| H       | -1,382864   | 1,747745  | 0,000313  | H        | 1,843650    | 1,374405  | 0,207447  | H             | -1,856696    | -1,343635 | 0,066197  |
| H       | 1,375729    | 1,752988  | -0,000065 | H        | 1,843527    | -1,374559 | 0,207375  | H             | -1,856636    | 1,343715  | 0,066216  |
| H       | 2,002456    | -0,722357 | 0,000685  | H        | -0,617786   | -2,016490 | -0,030818 | H             | 0,547771     | 1,979400  | 0,328259  |
|         |             |           |           | H        | -2,170358   | 0,000008  | 0,049720  | H             | 2,059021     | -0,000045 | -0,546792 |
|         |             |           |           | H        | -2,281861   | 0,000169  | 1,586115  | H             | 1,511071     | -0,000025 | 1,157061  |

| 4P      | B3LYP/TZVP   |           |           | 4P H2 TS | B3LYP/TZVP  |           |           | 4P H2 Product | B3LYP/TZVP   |           |           |
|---------|--------------|-----------|-----------|----------|-------------|-----------|-----------|---------------|--------------|-----------|-----------|
| 9       |              |           |           | 11       |             |           |           | 11            |              |           |           |
| E(SCF)= | -799,3747693 |           |           | E(SCF)=  | -800,527743 |           |           | E(SCF)=       | -800,6859433 |           |           |
| C       | -0,000459    | -1,444408 | -0,000495 | C        | -0,007976   | -1,343151 | -0,040474 | C             | -0,002096    | -1,300602 | 0,234193  |
| P       | 1,333667     | -0,354808 | 0,114873  | P        | 1,489049    | -0,271164 | -0,045165 | P             | -1,519907    | -0,274132 | -0,209542 |
| C       | 0,669415     | 1,337040  | -0,061794 | C        | 0,637639    | 1,376683  | 0,120788  | C             | -0,668702    | 1,330581  | 0,084732  |
| C       | -0,668751    | 1,337529  | 0,061849  | C        | -0,694851   | 1,354011  | 0,205999  | C             | 0,664181     | 1,342578  | 0,081454  |
| P       | -1,333880    | -0,354340 | -0,114675 | P        | -1,416247   | -0,270853 | -0,262568 | P             | 1,562961     | -0,273256 | -0,003647 |
| H       | 2,370712     | -0,596716 | -0,813114 | H        | -2,343983   | -0,613274 | 0,753426  | H             | 1,619967     | -0,363757 | -1,432155 |
| H       | 1,288758     | 2,224370  | -0,093499 | H        | -1,304063   | 2,240663  | 0,346427  | H             | 1,234770     | 2,262347  | 0,157954  |
| H       | -2,369940    | -0,596632 | 0,813994  | H        | 1,641286    | -0,327116 | -1,462569 | H             | -2,216975    | -0,355555 | 1,034360  |
| H       | -1,287571    | 2,225224  | 0,092294  | H        | 0,004148    | -2,100077 | 1,153537  | H             | 0,053218     | -2,194893 | -0,385399 |
|         |              |           |           | H        | 0,082827    | -1,680705 | 1,874399  | H             | -0,041956    | -1,615452 | 1,276398  |
|         |              |           |           | H        | 1,218887    | 2,285511  | 0,232912  | H             | -1,255135    | 2,242790  | 0,144408  |

| 5N      | B3LYP/TZVP  |  |  | 5N H2 TS | B3LYP/TZVP  |  |  | 5N H2 Product | B3LYP/TZVP  |  |  |
|---------|-------------|--|--|----------|-------------|--|--|---------------|-------------|--|--|
| 8       |             |  |  | 10       |             |  |  | 10            |             |  |  |
| E(SCF)= | -242,292333 |  |  | E(SCF)=  | -243,400675 |  |  | E(SCF)=       | -243,505494 |  |  |

|   |           |           |           |   |           |           |           |   |           |           |           |
|---|-----------|-----------|-----------|---|-----------|-----------|-----------|---|-----------|-----------|-----------|
| C | -0,337758 | -1,211463 | -0,000124 | N | -0,117309 | 1,088248  | -0,167185 | N | 0,187615  | 1,136285  | -0,176695 |
| N | 0,906692  | -0,634321 | 0,000068  | C | -1,089586 | 0,120813  | -0,170624 | C | -1,083726 | 0,457268  | 0,102718  |
| C | 0,819863  | 0,739745  | -0,000130 | N | -0,373816 | -1,027402 | -0,150228 | N | -0,687251 | -0,930906 | -0,194360 |
| N | -0,419343 | 1,113817  | 0,000090  | N | 0,968617  | -0,816703 | 0,118348  | N | 0,711758  | -1,042066 | 0,059938  |
| N | -1,089842 | -0,098825 | 0,000024  | C | 1,084375  | 0,469154  | 0,096268  | C | 1,156140  | 0,152915  | 0,043170  |
| H | -2,095362 | -0,076135 | 0,000013  | H | -0,311373 | 2,069069  | -0,056924 | H | 0,333500  | 2,033977  | 0,260635  |
| H | 1,661487  | 1,411583  | -0,000166 | H | 2,012810  | 0,998307  | 0,226668  | H | 2,206445  | 0,394848  | 0,109907  |
| H | 1,758692  | -1,169835 | 0,000403  | H | -0,749631 | -1,947931 | -0,005683 | H | -1,177090 | -1,628163 | 0,349339  |
|   |           |           |           | H | -2,144331 | 0,264934  | 0,115379  | H | -1,876414 | 0,788469  | -0,568715 |
|   |           |           |           | H | -2,118658 | 0,366822  | 1,560155  | H | -1,405780 | 0,606580  | 1,151332  |

| 5P      | B3LYP/TZVP  |           |           | 5P H2 TS | B3LYP/TZVP  |           |           | 5P H2 Product | B3LYP/TZVP  |           |           |
|---------|-------------|-----------|-----------|----------|-------------|-----------|-----------|---------------|-------------|-----------|-----------|
| 8       |             |           |           | 10       |             |           |           | 10            |             |           |           |
| E(SCF)= | -815,427150 |           |           | E(SCF)=  | -816,580724 |           |           | E(SCF)=       | -816,738594 |           |           |
| P       | 0,230345    | 0,116891  | -1,196718 | C        | 1,734137    | -0,598845 | -0,671060 | C             | -0,107498   | -1,304661 | 0,183827  |
| N       | -1,018518   | 0,046884  | 0,072412  | P        | 1,231352    | -1,130479 | 0,951749  | P             | -1,673441   | -0,263574 | 0,208372  |
| C       | -0,477767   | -0,204743 | 1,197601  | C        | -0,320296   | -0,080069 | 1,105636  | C             | -0,700319   | 1,328617  | -0,101032 |
| P       | 1,266242    | -0,849961 | 1,059087  | N        | -0,818343   | 0,358753  | 0,028000  | N             | 0,563430    | 1,347052  | -0,113551 |
| C       | 1,695138    | -0,567866 | -0,572024 | P        | 0,254456    | 0,202866  | -1,406935 | P             | 1,373871    | -0,138941 | 0,374073  |
| H       | 2,167219    | -0,405138 | 2,053338  | H        | 2,182005    | -0,628405 | 1,875519  | H             | -1,753521   | -0,071565 | 1,623709  |
| H       | -1,050534   | -0,206787 | 2,121213  | H        | -0,870208   | -0,005038 | 2,044565  | H             | -1,254574   | 2,244208  | -0,315601 |
| H       | -0,303078   | -0,663335 | -2,248779 | H        | -0,282231   | -1,020844 | -1,904744 | H             | 2,002099    | -0,378422 | -0,882591 |
|         |             |           |           | H        | 2,812214    | 0,321124  | -0,715256 | H             | -0,072319   | -1,856701 | -0,754599 |
|         |             |           |           | H        | 2,672778    | 1,071784  | -0,381238 | H             | -0,131388   | -2,023015 | 1,002135  |

| 6N      | B3LYP/TZVP  |           |           | 6N H2 TS | B3LYP/TZVP  |           |           | 6N H2 Product | B3LYP/TZVP  |           |           |
|---------|-------------|-----------|-----------|----------|-------------|-----------|-----------|---------------|-------------|-----------|-----------|
| 59      |             |           |           | 61       |             |           |           | 61            |             |           |           |
| E(SCF)= | -952,544336 |           |           | E(SCF)=  | -953,687349 |           |           | E(SCF)=       | -953,804286 |           |           |
| C       | 4,595189    | 0,044664  | -1,420442 | C        | -2,260145   | -1,076210 | -0,200850 | C             | -2,223871   | -0,954235 | -0,433677 |
| C       | 3,769996    | -1,244614 | -1,390929 | C        | -1,388314   | -0,009281 | 0,106661  | C             | -1,371841   | 0,123016  | -0,078205 |
| C       | 3,126154    | -1,469353 | -0,019782 | C        | -1,778652   | 1,328831  | -0,128467 | C             | -1,821279   | 1,452231  | -0,287888 |
| C       | 2,265258    | -0,282118 | 0,473944  | C        | -3,084370   | 1,574441  | -0,554691 | C             | -3,123452   | 1,672557  | -0,739824 |
| C       | 3,102756    | 1,022423  | 0,373892  | C        | -3,978738   | 0,539355  | -0,774973 | C             | -3,975086   | 0,618209  | -1,024729 |
| C       | 3,744371    | 1,245791  | -0,999639 | C        | -3,556996   | -0,769927 | -0,620599 | C             | -3,514560   | -0,681273 | -0,890863 |
| C       | 1,017444    | -0,139070 | -0,385111 | N        | -0,068637   | -0,280132 | 0,644040  | N             | -0,051801   | -0,097690 | 0,429074  |
| N       | -0,004788   | -0,073169 | 0,426244  | C        | 1,010916    | -0,363830 | -0,132070 | C             | 1,016464    | -0,518590 | -0,467544 |
| C       | 0,270137    | -0,133675 | 1,947042  | C        | 2,260770    | -0,399797 | 0,723571  | C             | 2,300691    | -0,484257 | 0,389652  |
| C       | 1,755301    | -0,531304 | 1,923806  | C        | 1,707726    | -0,773189 | 2,122411  | C             | 1,737357    | -0,820149 | 1,788975  |
| C       | -1,360573   | 0,060284  | -0,080739 | C        | 0,201967    | -0,425894 | 2,135107  | C             | 0,278635    | -0,300040 | 1,866868  |
| C       | -1,895895   | 1,340417  | -0,321455 | C        | 2,905765    | 1,019692  | 0,723836  | C             | 2,974319    | 0,907834  | 0,361937  |
| C       | -3,227192   | 1,429430  | -0,734004 | C        | 3,522425    | 1,404539  | -0,625047 | C             | 3,661707    | 1,237213  | -0,969870 |
| C       | -3,995730   | 0,295398  | -0,940507 | C        | 4,553669    | 0,371961  | -1,088109 | C             | 4,658265    | 0,150660  | -1,382608 |
| C       | -3,424040   | -0,957372 | -0,783514 | C        | 3,960963    | -1,039713 | -1,092333 | C             | 3,990269    | -1,227256 | -1,399663 |
| C       | -2,099736   | -1,104562 | -0,367920 | C        | 3,341559    | -1,397305 | 0,260177  | C             | 3,330750    | -1,541524 | -0,052473 |
| C       | -1,052075   | 2,608781  | -0,285121 | C        | -0,815877   | 2,506083  | -0,036549 | C             | -0,900269   | 2,654537  | -0,128207 |
| C       | -0,663824   | 3,014599  | -1,719649 | C        | -1,359325   | 3,678780  | 0,793445  | C             | -1,479614   | 3,751166  | 0,777339  |
| C       | -1,476981   | -2,495737 | -0,371514 | C        | -1,833239   | -2,540653 | -0,205692 | C             | -1,772031   | -2,410843 | -0,410715 |
| C       | -2,341257   | -3,559571 | 0,320357  | C        | -1,789918   | -3,077774 | -1,648777 | C             | -1,596988   | -2,949727 | -1,843127 |
| C       | -1,142820   | -2,910606 | -1,816701 | C        | -0,419775   | 2,978705  | -1,447834 | C             | -0,527039   | 3,235865  | -1,504774 |
| C       | -1,724917   | 3,776612  | 0,450640  | C        | -2,735490   | -3,437236 | 0,658251  | C             | -2,716514   | -3,324666 | 0,386920  |



|   |           |           |           |   |           |           |           |   |           |           |           |
|---|-----------|-----------|-----------|---|-----------|-----------|-----------|---|-----------|-----------|-----------|
| C | -0,531464 | -1,178060 | 1,748869  | C | -0,619092 | -0,491821 | 1,969269  | C | 2,532216  | -0,802039 | 0,048348  |
| C | 0,246681  | -2,408350 | 2,226840  | C | -2,086240 | -0,896453 | 1,659973  | C | 3,536600  | -1,644789 | -0,777493 |
| C | -1,975195 | -1,538668 | 1,314482  | C | 1,686431  | 0,149966  | -0,217559 | C | 4,417804  | -0,825286 | -1,725803 |
| C | 1,641128  | 0,302607  | -0,178469 | C | 2,649179  | -0,866790 | -0,461699 | C | 5,171483  | 0,278048  | -0,978683 |
| C | 2,765208  | -0,494340 | -0,499207 | C | 3,950220  | -0,494126 | -0,801854 | C | 4,202262  | 1,158578  | -0,186322 |
| C | 3,996938  | 0,132684  | -0,686797 | C | 4,316623  | 0,837446  | -0,901775 | C | 3,327312  | 0,324447  | 0,756916  |
| C | 4,124130  | 1,507350  | -0,567645 | C | 3,378723  | 1,824903  | -0,653969 | C | 1,852850  | -1,746275 | 1,086500  |
| C | 3,016885  | 2,281165  | -0,258799 | C | 2,064079  | 1,510615  | -0,305274 | C | 0,394892  | -1,369830 | 1,432882  |
| C | 1,760318  | 1,707945  | -0,054919 | C | 2,340856  | -2,361612 | -0,409023 | C | -0,221468 | 2,471791  | 0,302782  |
| C | 2,677741  | -2,001616 | -0,706616 | C | 2,305965  | -2,966243 | -1,822054 | C | -0,341579 | 3,336528  | 1,569979  |
| C | 2,751925  | -2,352358 | -2,202272 | C | 1,102887  | 2,662806  | -0,065398 | C | -3,193756 | -1,714700 | -0,611100 |
| C | 0,587025  | 2,630739  | 0,245024  | C | 1,610013  | 3,641083  | 1,006029  | C | -3,550267 | -2,053879 | -2,066915 |
| C | 0,877655  | 3,612207  | 1,390701  | C | 0,784842  | 3,403100  | -1,375730 | C | 0,266933  | 3,324551  | -0,881914 |
| C | -0,468576 | -0,086300 | 2,825677  | C | 3,302323  | -3,134822 | 0,506419  | C | -4,269463 | -2,227607 | 0,359976  |
| C | 0,137788  | 3,371674  | -1,025990 | H | -2,420949 | -2,299156 | -0,726163 | C | -0,356576 | -2,607685 | 1,948670  |
| C | 3,724964  | -2,781171 | 0,101718  | C | -0,537103 | 0,864105  | 2,673027  | C | 0,290463  | -0,273826 | 2,498663  |
| H | -2,832145 | -2,393506 | -1,196858 | H | -5,292274 | 1,752257  | -0,564107 | H | 1,838976  | -2,754596 | 0,661500  |
| H | -4,722114 | 2,058596  | -0,039949 | C | 0,103938  | -1,556352 | 2,797952  | H | 2,455401  | -1,807736 | 1,998750  |
| H | -2,652890 | -1,454672 | 2,169263  | H | -1,725172 | 2,100546  | -0,259270 | H | -2,564774 | 3,611920  | -0,031442 |
| H | -1,979611 | -2,587711 | 1,007586  | H | -2,149441 | -1,986942 | 1,665760  | H | -5,005239 | 0,201384  | -0,726553 |
| H | 4,866616  | -0,460915 | -0,938541 | H | -2,735262 | -0,539748 | 2,464605  | H | -4,771068 | 2,640797  | -0,504538 |
| H | 3,129721  | 3,354673  | -0,176843 | H | -4,496976 | 0,161827  | 1,131094  | H | -2,277578 | -2,255289 | -0,382494 |
| H | 5,088178  | 1,978042  | -0,720605 | H | -3,391743 | 1,522051  | 1,008994  | H | -4,021513 | -1,981164 | 1,394528  |
| H | -0,250826 | 2,007490  | 0,554909  | H | -3,938795 | -2,068982 | 0,132063  | H | -5,255426 | -1,808937 | 0,146827  |
| H | 1,209522  | 3,091095  | 2,291084  | H | -3,786092 | 1,636566  | -1,448532 | H | -4,353307 | -3,314516 | 0,282863  |
| H | 1,645598  | 4,341613  | 1,124073  | H | -4,328416 | -2,065072 | -2,308423 | H | -4,460125 | -1,539109 | -2,385338 |
| H | -0,027314 | 4,171856  | 1,638239  | H | -3,166453 | -0,761641 | -2,518495 | H | -3,714581 | -3,128502 | -2,181403 |
| H | 0,936982  | 4,007359  | -1,416011 | H | -5,818815 | -0,605449 | -1,005760 | H | -2,744650 | -1,761089 | -2,742932 |
| H | -0,722872 | 4,008906  | -0,807997 | H | -5,452280 | 0,179743  | -2,532481 | H | 0,536802  | 1,726555  | 0,512669  |
| H | -0,154184 | 2,663451  | -1,801916 | H | 4,688836  | -1,261155 | -0,997289 | H | 0,381760  | 2,726964  | -1,788168 |
| H | 1,694640  | -2,327504 | -0,357985 | H | 5,331691  | 1,104440  | -1,171534 | H | -0,442054 | 4,124755  | -1,105671 |
| H | 1,963323  | -1,848054 | -2,763159 | H | 3,671044  | 2,864693  | -0,730836 | H | 1,230255  | 3,788177  | -0,653529 |
| H | 3,712636  | -2,054395 | -2,629090 | H | 0,167831  | 2,245054  | 0,299482  | H | -1,022560 | 4,177764  | 1,427786  |
| H | 2,638409  | -3,429388 | -2,347991 | H | 0,040656  | 4,183122  | -1,200344 | H | 0,635117  | 3,749704  | 1,835263  |
| H | 4,740654  | -2,579624 | -0,245352 | H | 1,678363  | 3,877264  | -1,789621 | H | -0,704364 | 2,753621  | 2,417831  |
| H | 3,553647  | -3,855204 | -0,000227 | H | 0,387924  | 2,720260  | -2,128781 | H | 4,184817  | -2,186009 | -0,077468 |
| H | 3,679289  | -2,530238 | 1,163166  | H | 0,844410  | 4,390990  | 1,218633  | H | 2,984372  | -2,405217 | -1,338264 |
| H | -4,082028 | 0,118855  | 1,328703  | H | 1,846602  | 3,126397  | 1,939089  | H | 3,800843  | -0,374483 | -2,510865 |
| H | -2,725026 | 1,217386  | 1,161363  | H | 2,507713  | 4,172061  | 0,682052  | H | 5,122060  | -1,489252 | -2,235193 |
| H | -3,394564 | 1,756992  | -1,156195 | H | 1,339461  | -2,481959 | 0,006000  | H | 3,974673  | -0,141298 | 1,509030  |
| H | -4,161692 | -2,060562 | -0,096609 | H | 2,041691  | -4,025752 | -1,777600 | H | 2,650784  | 0,982722  | 1,304860  |
| H | -4,831214 | -1,538107 | -2,408798 | H | 1,569039  | -2,458659 | -2,447083 | H | 4,752716  | 1,904726  | 0,393938  |
| H | -3,453002 | -0,458209 | -2,596577 | H | 3,278007  | -2,883025 | -2,314343 | H | 3,571055  | 1,718611  | -0,884543 |
| H | -5,483906 | 0,873892  | -2,125757 | H | 2,982547  | -4,176388 | 0,588289  | H | 5,752991  | 0,884379  | -1,678902 |
| H | -5,801538 | -0,065582 | -0,676665 | H | 4,324599  | -3,137707 | 0,122066  | H | 5,890703  | -0,179024 | -0,288529 |
| H | -0,865980 | -0,475743 | 3,768799  | H | 3,325056  | -2,708453 | 1,511223  | H | 1,552494  | -0,544391 | -1,906136 |
| H | 0,560584  | 0,230861  | 3,010044  | H | -1,625603 | 1,437104  | -0,890626 | H | 1,454394  | 0,875864  | -0,908609 |
| H | -1,050508 | 0,794775  | 2,558633  | H | -1,019133 | 0,800077  | 3,654621  | H | -1,399450 | -2,374364 | 2,175831  |
| H | -0,204384 | -2,805342 | 3,141848  | H | 0,499050  | 1,168880  | 2,833394  | H | -0,343234 | -3,418951 | 1,218633  |
| H | 0,242757  | -3,205632 | 1,481741  | H | -1,042851 | 1,650930  | 2,110345  | H | 0,102683  | -2,974179 | 2,872715  |
| H | 1,285268  | -2,160691 | 2,459123  | H | -0,363340 | -1,654451 | 3,782780  | H | -0,749011 | 0,020930  | 2,655472  |
|   |           |           |           |   | 0,071419  | -2,534057 | 2,313377  | H | 0,675042  | -0,650391 | 3,453133  |

---

---

**For your convenience now all  
reactant molecules**

---

**H2**

2

E(SCF)= -1,179649  
H 0,000000 0,000000 -0,001893  
H 0,000000 0,000000 0,741893

---

**CH4**

5

E(SCF)= -40,537041  
C -0,034061 -0,058802 0,194058  
H 0,200323 -0,339701 1,220237  
H 0,887648 0,169986 -0,340194  
H -0,543620 -0,885472 -0,300364  
H -0,681410 0,817602 0,194263

---

**NH3**

4

E(SCF)= -56,583709  
N -0,009781 0,016942 -0,006917  
H 0,004269 -0,007394 1,005765  
H 0,949667 -0,007395 -0,331230  
H -0,468430 -0,826133 -0,331230

---

**OH2**

3

E(SCF)= -76,460622  
O -0,020420 0,000000 -0,014439  
H 0,017135 0,000000 0,947426  
H 0,898954 0,000000 -0,299652

---

**SiH4**

5

E(SCF)= -291,908643  
H -0,000003 0,000000 -0,397497  
Si -0,000002 0,000000 1,088999  
H 1,401488 0,000000 1,584502  
H -0,700742 1,213736 1,584498  
H -0,700742 -1,213736 1,584498

---

**C6H6**

12

E(SCF)= -232,328392  
H 0,000000 0,000000 0,013534  
C 0,000000 0,000000 1,096916



|   |           |          |          |
|---|-----------|----------|----------|
| C | 1,205580  | 0,000000 | 1,792958 |
| C | 1,205580  | 0,000000 | 3,185042 |
| C | 0,000000  | 0,000000 | 3,881084 |
| C | -1,205580 | 0,000000 | 3,185042 |
| C | -1,205580 | 0,000000 | 1,792958 |
| H | 2,143817  | 0,000000 | 1,251267 |
| H | 2,143817  | 0,000000 | 3,726733 |
| H | 0,000000  | 0,000000 | 4,964466 |
| H | -2,143817 | 0,000000 | 3,726733 |
| H | -2,143817 | 0,000000 | 1,251267 |

---

**C2H6**

---

8

|         |            |           |           |
|---------|------------|-----------|-----------|
| E(SCF)= | -79,862335 |           |           |
| C       | 0,027362   | -0,011889 | -0,038606 |
| C       | -0,027362  | 0,011889  | 1,488606  |
| H       | 1,056186   | 0,047267  | -0,400803 |
| H       | -0,409693  | -0,929820 | -0,438142 |
| H       | 0,409693   | 0,929820  | 1,888142  |
| H       | -1,056186  | -0,047267 | 1,850803  |
| H       | 0,521746   | -0,828395 | 1,919524  |
| H       | -0,521746  | 0,828395  | -0,469524 |

---

**C2H4**

---

6

|         |            |          |          |
|---------|------------|----------|----------|
| E(SCF)= | -78,621545 |          |          |
| H       | -0,029073  | 0,000000 | 0,008170 |
| C       | 0,003948   | 0,000000 | 1,091279 |
| C       | 1,152196   | 0,000000 | 1,754221 |
| H       | -0,950563  | 0,000000 | 1,604238 |
| H       | 1,185217   | 0,000000 | 2,837330 |
| H       | 2,106707   | 0,000000 | 1,241262 |

---

**C2H2**

---

4

|         |            |          |           |
|---------|------------|----------|-----------|
| E(SCF)= | -77,362334 |          |           |
| C       | 0,001933   | 0,000000 | 0,003019  |
| C       | 0,000801   | 0,000000 | 1,201002  |
| H       | 0,017358   | 0,000000 | -1,059663 |
| H       | 0,008894   | 0,000000 | 2,263763  |

---

**CH3F**

---

5

|         |             |           |           |
|---------|-------------|-----------|-----------|
| E(SCF)= | -139,802536 |           |           |
| C       | 0,034266    | -0,155202 | 0,101100  |
| H       | -0,099637   | 0,539570  | 0,931994  |
| H       | 1,038938    | -0,053571 | -0,312718 |
| H       | -0,710053   | 0,038793  | -0,672752 |
| F       | -0,130262   | -1,455531 | 0,570266  |

---

**CH3Cl**

---

5

|         |             |           |           |
|---------|-------------|-----------|-----------|
| E(SCF)= | -500,150822 |           |           |
| C       | 0,026585    | -0,046047 | 0,002019  |
| H       | 0,016215    | -0,028085 | 1,087623  |
| H       | 1,045612    | -0,024667 | -0,371829 |
| H       | -0,501445   | -0,917860 | -0,371829 |
| Cl      | -0,827856   | 1,433889  | -0,597317 |

\*\*\*\*\*

**Now reaction scheme molecules  
 1N without hydrogen (see above)**

**1N** B3LYP/TZVP

12

|         |             |           |           |
|---------|-------------|-----------|-----------|
| E(SCF)= | -211,393483 |           |           |
| C       | 0,085575    | 0,118916  | -1,238463 |
| C       | -0,879063   | 0,375513  | -0,074658 |
| N       | -0,199926   | -0,348680 | 1,039375  |
| C       | 0,794614    | -1,153576 | 0,773091  |
| C       | 0,957057    | -1,064995 | -0,730486 |
| H       | -0,550712   | -0,244589 | 1,982352  |
| H       | -1,000785   | 1,430455  | 0,175538  |
| H       | -1,870633   | -0,055459 | -0,238501 |
| H       | 0,707104    | 0,998125  | -1,414702 |
| H       | -0,440998   | -0,104241 | -2,165726 |
| H       | 2,009742    | -0,974637 | -1,002654 |
| H       | 0,626702    | -2,028198 | -1,137206 |

**1N CH4 TS**

17

|         |             |           |           |
|---------|-------------|-----------|-----------|
| E(SCF)= | -251,874273 |           |           |
| C       | 1,579607    | -0,300239 | 0,651595  |
| C       | 1,291280    | 0,736194  | -0,462077 |
| C       | 0,010292    | 0,205301  | -1,133910 |
| N       | -0,540957   | -0,687276 | -0,101495 |
| C       | 0,229266    | -0,879089 | 0,979165  |
| C       | -0,480786   | 0,590068  | 2,757518  |
| H       | -1,474693   | -1,057346 | -0,172309 |
| H       | -0,694764   | 1,001894  | -1,386043 |
| H       | 0,225184    | -0,358300 | -2,047288 |
| H       | 1,099091    | 1,712343  | -0,015475 |
| H       | 2,111614    | 0,844985  | -1,171184 |
| H       | 2,077904    | 0,122557  | 1,520630  |
| H       | 2,210865    | -1,108451 | 0,263200  |
| H       | -0,186562   | -0,853107 | 2,049574  |
| H       | 0,118700    | 0,520193  | 3,665442  |
| H       | -0,293897   | 1,516211  | 2,217995  |
| H       | -1,544234   | 0,450018  | 2,954020  |

**1N CH4  
 Product**

17

|         |             |           |           |
|---------|-------------|-----------|-----------|
| E(SCF)= | -251,989739 |           |           |
| C       | 1,440679    | 0,295897  | 0,815786  |
| C       | 1,395989    | 0,461213  | -0,721286 |
| C       | -0,075195   | 0,112556  | -1,102761 |
| N       | -0,844945   | 0,015900  | 0,146317  |
| C       | 0,122056    | -0,432458 | 1,160458  |
| C       | -0,383564   | -0,213103 | 2,576419  |
| H       | -1,184029   | 0,938032  | 0,406992  |
| H       | -0,530316   | 0,842949  | -1,772497 |
| H       | -0,110627   | -0,855502 | -1,609917 |
| H       | 1,659093    | 1,477654  | -1,018489 |
| H       | 2,098262    | -0,209333 | -1,220034 |
| H       | 1,448814    | 1,273017  | 1,308606  |
| H       | 2,323339    | -0,247962 | 1,158568  |
| H       | 0,268809    | -1,508512 | 1,002709  |
| H       | 0,341850    | -0,573364 | 3,308769  |
| H       | -0,548201   | 0,851915  | 2,769594  |
| H       | -1,325231   | -0,739638 | 2,740728  |

**1N NH3 TS**

16

**1N NH3  
 Product**

16

|         |             |           |           |         |             |           |           |
|---------|-------------|-----------|-----------|---------|-------------|-----------|-----------|
| E(SCF)= | -267,938613 |           |           | E(SCF)= | -268,033233 |           |           |
| C       | -0,018770   | 0,584951  | 1,236812  | C       | 0,753093    | -0,093759 | -0,592769 |
| C       | 1,104028    | 1,334666  | 0,577950  | C       | -0,137924   | 1,161426  | -0,476137 |
| C       | 0,924487    | 1,032439  | -0,927814 | C       | -1,172495   | 0,755499  | 0,581267  |
| C       | 0,217940    | -0,335242 | -0,939945 | C       | -1,424358   | -0,725820 | 0,251894  |
| N       | -0,387382   | -0,380327 | 0,402611  | N       | -0,206102   | -1,183721 | -0,442655 |
| N       | -1,738388   | 2,117979  | 1,747143  | N       | 1,843352    | -0,204715 | 0,386059  |
| H       | -1,092013   | -1,059487 | 0,644610  | H       | 0,227580    | -1,996685 | -0,029073 |
| H       | -0,547232   | -0,414854 | -1,715008 | H       | -1,630223   | -1,319148 | 1,146908  |
| H       | 0,918799    | -1,166030 | -1,065481 | H       | -2,293259   | -0,826721 | -0,408061 |
| H       | 0,276745    | 1,786739  | -1,376880 | H       | -0,751205   | 0,860369  | 1,585434  |
| H       | 1,863197    | 1,016765  | -1,480198 | H       | -2,081033   | 1,357716  | 0,546701  |
| H       | 1,094227    | 2,394413  | 0,819161  | H       | 0,440824    | 2,047404  | -0,212741 |
| H       | 2,050958    | 0,920224  | 0,946300  | H       | -0,631758   | 1,351643  | -1,433291 |
| H       | -0,718927   | 1,030315  | 2,036901  | H       | 1,232411    | -0,140230 | -1,575397 |
| H       | -1,338158   | 3,027161  | 1,513369  | H       | 2,618167    | 0,402739  | 0,140975  |
| H       | -2,377633   | 1,899886  | 0,982009  | H       | 1,533719    | 0,046246  | 1,319897  |

| 1N OH2 TS |             |           |           | 1N OH2 Product |             |           |           |
|-----------|-------------|-----------|-----------|----------------|-------------|-----------|-----------|
| 15        |             |           |           | 15             |             |           |           |
| E(SCF)=   | -287,838444 |           |           | E(SCF)=        | -287,914256 |           |           |
| N         | 0,115454    | -0,034716 | -0,041587 | N              | -0,159579   | -1,098450 | -0,559431 |
| C         | 0,045535    | -0,027412 | 1,431757  | C              | -1,344764   | -0,786155 | 0,266168  |
| C         | 1,533297    | 0,030079  | 1,824610  | C              | -1,249968   | 0,733402  | 0,528230  |
| C         | 2,235921    | 0,549865  | 0,547456  | C              | -0,167073   | 1,212819  | -0,453015 |
| C         | 1,295291    | 0,190842  | -0,562503 | C              | 0,757505    | -0,003461 | -0,544094 |
| O         | 1,922161    | -1,664036 | -1,711031 | O              | 1,624442    | -0,102646 | 0,615634  |
| H         | -0,663957   | -0,329706 | -0,611520 | H              | 0,278431    | -1,984457 | -0,348505 |
| H         | -0,517290   | 0,845798  | 1,772712  | H              | -2,253922   | -1,046032 | -0,283498 |
| H         | -0,459715   | -0,924692 | 1,790986  | H              | -1,354127   | -1,346572 | 1,205503  |
| H         | 1,705092    | 0,661801  | 2,694747  | H              | -2,203240   | 1,241468  | 0,382257  |
| H         | 1,891561    | -0,973282 | 2,054556  | H              | -0,924664   | 0,916680  | 1,552295  |
| H         | 2,350143    | 1,640232  | 0,562550  | H              | -0,588049   | 1,419812  | -1,439957 |
| H         | 3,222155    | 0,121085  | 0,385171  | H              | 0,358650    | 2,105682  | -0,112682 |
| H         | 1,592102    | -0,245703 | -1,589604 | H              | 1,383508    | -0,004708 | -1,443221 |
| H         | 2,879355    | -1,762200 | -1,801259 | H              | 2,326967    | 0,553656  | 0,531513  |

| 1N SiH4 TS |             |           |           | 1N SiH4 Product |             |           |           |
|------------|-------------|-----------|-----------|-----------------|-------------|-----------|-----------|
| 17         |             |           |           | 17              |             |           |           |
| E(SCF)=    | -503,275336 |           |           | E(SCF)=         | -503,368318 |           |           |
| C          | 0,348040    | -0,982913 | 0,807641  | C               | 0,119508    | -0,399721 | 1,099149  |
| C          | 1,658559    | -0,319656 | 0,452916  | C               | 1,487555    | 0,230955  | 0,731379  |
| C          | 1,309154    | 0,708665  | -0,649209 | C               | 1,435055    | 0,364552  | -0,813673 |
| C          | 0,046806    | 0,116729  | -1,297446 | C               | -0,038613   | 0,033872  | -1,186227 |
| N          | -0,456164   | -0,768958 | -0,226932 | N               | -0,822413   | 0,053599  | 0,060592  |
| Si         | -0,584766   | 0,616453  | 3,157849  | Si              | -0,511359   | -0,050182 | 2,860640  |
| H          | -1,386528   | -1,158559 | -0,271282 | H               | -1,110211   | 1,008094  | 0,255277  |
| H          | -0,700320   | 0,868980  | -1,560291 | H               | -0,465957   | 0,726401  | -1,912374 |
| H          | 0,272022    | -0,469840 | -2,193151 | H               | -0,102551   | -0,969419 | -1,615727 |
| H          | 1,076340    | 1,672143  | -0,193240 | H               | 1,708685    | 1,372888  | -1,128470 |
| H          | 2,111344    | 0,859003  | -1,370923 | H               | 2,128065    | -0,323684 | -1,300580 |
| H          | 2,152641    | 0,117792  | 1,318447  | H               | 1,592713    | 1,217800  | 1,191369  |

|   |           |           |          |   |           |           |          |
|---|-----------|-----------|----------|---|-----------|-----------|----------|
| H | 2,317760  | -1,102060 | 0,058503 | H | 2,328086  | -0,374749 | 1,074499 |
| H | -0,081721 | -0,783143 | 1,978124 | H | 0,204525  | -1,489662 | 0,999642 |
| H | -0,163315 | 0,373552  | 4,577303 | H | 0,552301  | -0,376135 | 3,851309 |
| H | -0,097903 | 1,995739  | 2,813291 | H | -0,839638 | 1,401302  | 2,975711 |
| H | -2,084040 | 0,712028  | 3,167759 | H | -1,725396 | -0,848761 | 3,176337 |

| 1N C6H6 CC<br>TS |             |           |           | 1N C6H6<br>CC<br>Product |             |           |           |
|------------------|-------------|-----------|-----------|--------------------------|-------------|-----------|-----------|
| 24               |             |           |           | 24                       |             |           |           |
| E(SCF)=          | -443,686173 |           |           | E(SCF)=                  | -443,720937 |           |           |
| N                | 0,731566    | 0,050236  | -0,835847 | N                        | 0,651435    | -0,314765 | -0,729378 |
| C                | -0,065767   | -0,216114 | 0,380333  | C                        | 0,093828    | -0,514210 | 0,612150  |
| C                | 1,025909    | -0,312609 | 1,459339  | C                        | 1,030275    | 0,328138  | 1,496462  |
| C                | 2,215902    | 0,450397  | 0,827185  | C                        | 2,382032    | 0,328947  | 0,731859  |
| C                | 1,996741    | 0,363912  | -0,668524 | C                        | 2,076236    | -0,419616 | -0,564345 |
| C                | 3,173143    | -0,496127 | -1,863623 | C                        | 3,012131    | -0,381649 | -1,720209 |
| C                | 3,338436    | -1,699404 | -1,078998 | C                        | 2,852897    | -1,706912 | -0,854473 |
| C                | 2,496578    | -2,783267 | -1,284896 | C                        | 2,222489    | -2,833056 | -1,531528 |
| C                | 1,599243    | -2,805255 | -2,349372 | C                        | 1,636769    | -2,716404 | -2,743676 |
| C                | 1,673421    | -1,773194 | -3,312677 | C                        | 1,801977    | -1,520176 | -3,545068 |
| C                | 2,492311    | -0,687514 | -3,130081 | C                        | 2,520304    | -0,470656 | -3,100136 |
| H                | 0,355312    | -0,096418 | -1,764693 | H                        | 0,282459    | -0,957791 | -1,419704 |
| H                | -0,755479   | 0,614017  | 0,558895  | H                        | -0,943529   | -0,178152 | 0,650941  |
| H                | -0,648510   | -1,130543 | 0,266266  | H                        | 0,123154    | -1,568656 | 0,927582  |
| H                | 0,701186    | 0,102103  | 2,413530  | H                        | 0,647973    | 1,345079  | 1,588802  |
| H                | 1,300948    | -1,356316 | 1,615952  | H                        | 1,118897    | -0,084361 | 2,501907  |
| H                | 2,180663    | 1,514467  | 1,089409  | H                        | 2,703780    | 1,349548  | 0,513651  |
| H                | 3,189215    | 0,076795  | 1,137153  | H                        | 3,180802    | -0,155033 | 1,295253  |
| H                | 3,996488    | 0,205868  | -1,864620 | H                        | 3,915920    | 0,200721  | -1,570619 |
| H                | 4,080906    | -1,725298 | -0,291508 | H                        | 3,646732    | -1,940525 | -0,153032 |
| H                | 2,571610    | -3,645106 | -0,629818 | H                        | 2,255378    | -3,797928 | -1,037358 |
| H                | 0,954545    | -3,659353 | -2,511693 | H                        | 1,149037    | -3,573897 | -3,192123 |
| H                | 1,114416    | -1,871208 | -4,237980 | H                        | 1,434444    | -1,528920 | -4,564395 |
| H                | 2,584756    | 0,070134  | -3,899119 | H                        | 2,788331    | 0,331400  | -3,778314 |

| 1N C6H6 CH<br>TS |             |           |           | 1N C6H6<br>CH<br>Product |             |           |           |
|------------------|-------------|-----------|-----------|--------------------------|-------------|-----------|-----------|
| 24               |             |           |           | 24                       |             |           |           |
| E(SCF)=          | -443,670574 |           |           | done:                    | -443,781658 |           |           |
| N                | 0,444174    | -0,725471 | 0,998916  | N                        | 0,638299    | -0,539569 | 1,275516  |
| H                | 0,199336    | -1,398384 | 1,707421  | H                        | 0,097151    | -0,811920 | 2,082599  |
| C                | -0,179421   | -0,749369 | -0,337714 | C                        | -0,037297   | -0,788748 | -0,013532 |
| H                | 0,169037    | -1,622040 | -0,898810 | H                        | 0,444458    | -1,624987 | -0,531275 |
| H                | -1,267204   | -0,804289 | -0,261880 | H                        | -1,090567   | -1,057347 | 0,117902  |
| C                | 0,313613    | 0,574207  | -0,948633 | C                        | 0,120783    | 0,515960  | -0,814063 |
| H                | -0,434385   | 1,353255  | -0,798029 | H                        | -0,771397   | 1,137686  | -0,714299 |
| H                | 0,506421    | 0,485921  | -2,017419 | H                        | 0,280860    | 0,337662  | -1,878057 |
| C                | 1,579196    | 0,907561  | -0,123623 | C                        | 1,316710    | 1,201589  | -0,141384 |
| H                | 1,767040    | 1,973838  | -0,026943 | H                        | 1,345977    | 2,278751  | -0,302525 |
| H                | 2,465998    | 0,449325  | -0,577884 | H                        | 2,253584    | 0,775817  | -0,508822 |
| C                | 1,344072    | 0,237519  | 1,204337  | C                        | 1,149499    | 0,831767  | 1,351144  |
| C                | 0,293550    | 2,004950  | 2,457759  | C                        | 0,281434    | 1,829363  | 2,112187  |
| C                | 0,749689    | 3,301146  | 2,674382  | C                        | 0,883817    | 2,940076  | 2,711149  |

|   |           |          |          |   |           |          |          |
|---|-----------|----------|----------|---|-----------|----------|----------|
| C | -0,100140 | 4,268728 | 3,214332 | C | 0,129491  | 3,888800 | 3,390961 |
| C | -1,414737 | 3,937812 | 3,535701 | C | -1,251485 | 3,742167 | 3,490414 |
| C | -1,876471 | 2,642059 | 3,318510 | C | -1,863883 | 2,639075 | 2,906708 |
| C | -1,016939 | 1,683916 | 2,776980 | C | -1,103054 | 1,692268 | 2,225242 |
| H | 1,774576  | 3,575456 | 2,434177 | H | 1,960787  | 3,056936 | 2,648907 |
| H | 0,260892  | 5,277661 | 3,385343 | H | 0,619529  | 4,739086 | 3,850415 |
| H | -2,076328 | 4,687235 | 3,954134 | H | -1,842071 | 4,476666 | 4,024171 |
| H | -2,900438 | 2,383112 | 3,567662 | H | -2,937295 | 2,511501 | 2,982754 |
| H | -1,390703 | 0,674754 | 2,603979 | H | -1,596431 | 0,834746 | 1,784022 |
| H | 1,372941  | 0,838703 | 2,196246 | H | 2,131061  | 0,828127 | 1,836013 |

| 1N C2H6 CC<br>TS |             |           |           | 1N C2H6<br>CC<br>Product |             |           |           |
|------------------|-------------|-----------|-----------|--------------------------|-------------|-----------|-----------|
| 20               |             |           |           | 20                       |             |           |           |
| E(SCF)=          | -291,111422 |           |           | E(SCF)=                  | -291,317040 |           |           |
| N                | 0,038961    | 0,191772  | 0,006329  | N                        | -0,218911   | -0,922375 | -0,750016 |
| C                | 0,056998    | -0,233147 | 1,423014  | C                        | -1,588466   | -0,787687 | -0,237747 |
| C                | 1,527122    | -0,000988 | 1,831878  | C                        | -1,699495   | 0,704438  | 0,163107  |
| C                | 2,150081    | 0,765598  | 0,625322  | C                        | -0,263441   | 1,260775  | 0,033212  |
| C                | 1,190585    | 0,593404  | -0,529779 | C                        | 0,647914    | 0,016867  | -0,012104 |
| C                | 1,742853    | 0,103257  | -2,326844 | C                        | 1,936942    | 0,257381  | -0,797796 |
| C                | 2,106754    | -1,552912 | -1,084108 | C                        | 0,984591    | -0,471396 | 1,411990  |
| H                | -0,814135   | 0,139983  | -0,529596 | H                        | 0,121313    | -1,876358 | -0,707524 |
| H                | -0,638179   | 0,381613  | 2,000617  | H                        | -2,306558   | -1,063867 | -1,013039 |
| H                | -0,248995   | -1,277565 | 1,529675  | H                        | -1,789421   | -1,427374 | 0,633107  |
| H                | 1,600242    | 0,570287  | 2,756830  | H                        | -2,390094   | 1,244558  | -0,484768 |
| H                | 2,033107    | -0,950872 | 1,999506  | H                        | -2,076706   | 0,801616  | 1,182036  |
| H                | 2,186044    | 1,838282  | 0,844617  | H                        | -0,155356   | 1,811355  | -0,902720 |
| H                | 3,164856    | 0,451931  | 0,391480  | H                        | 0,004731    | 1,934939  | 0,848037  |
| H                | 2,514230    | 0,865578  | -2,373379 | H                        | 2,550836    | 1,025649  | -0,321064 |
| H                | 2,048092    | -0,707626 | -3,012058 | H                        | 2,536406    | -0,655607 | -0,855761 |
| H                | 0,824632    | 0,506065  | -2,752601 | H                        | 1,704540    | 0,573895  | -1,815427 |
| H                | 3,115740    | -1,701763 | -1,459544 | H                        | 1,609285    | 0,252822  | 1,941195  |
| H                | 1,377901    | -2,173825 | -1,596366 | H                        | 1,531977    | -1,417543 | 1,373937  |
| H                | 2,056809    | -1,701039 | -0,008536 | H                        | 0,083163    | -0,629727 | 2,008133  |

| 1N C2H6 CH<br>TS |             |           |           | 1N C2H6<br>CH<br>Product |             |           |           |
|------------------|-------------|-----------|-----------|--------------------------|-------------|-----------|-----------|
| 20               |             |           |           | 20                       |             |           |           |
| E(SCF)=          | -291,202399 |           |           | E(SCF)=                  | -291,316716 |           |           |
| C                | 0,318939    | 0,698412  | 1,160888  | C                        | 0,173571    | 0,738029  | 0,331278  |
| C                | 1,791389    | 0,752928  | 0,843640  | C                        | 1,708634    | 0,903852  | 0,328286  |
| C                | 2,014329    | -0,416996 | -0,145309 | C                        | 2,276892    | -0,538954 | 0,285047  |
| C                | 0,915845    | -1,422527 | 0,239656  | C                        | 1,029847    | -1,439471 | 0,307506  |
| N                | -0,084406   | -0,558848 | 0,887842  | N                        | -0,001726   | -0,584803 | -0,282948 |
| C                | -0,589343   | 2,118582  | -0,556799 | C                        | -0,576118   | 1,839786  | -0,412362 |
| H                | -0,967646   | -0,924499 | 1,200983  | H                        | -0,933647   | -0,956087 | -0,142847 |
| H                | 0,494831    | -1,942768 | -0,624055 | H                        | 1,155309    | -2,355785 | -0,272397 |
| H                | 1,282664    | -2,177116 | 0,944078  | H                        | 0,795955    | -1,727136 | 1,346067  |
| H                | 1,859830    | -0,071990 | -1,168858 | H                        | 2,842071    | -0,698360 | -0,633775 |
| H                | 3,011360    | -0,852681 | -0,081965 | H                        | 2,943594    | -0,753755 | 1,121002  |
| H                | 2,108333    | 1,718846  | 0,456205  | H                        | 2,018514    | 1,465308  | -0,555319 |
| H                | 2,348335    | 0,569668  | 1,770643  | H                        | 2,045491    | 1,461473  | 1,203208  |

|   |           |          |           |   |           |          |           |
|---|-----------|----------|-----------|---|-----------|----------|-----------|
| C | -1,889942 | 1,472875 | -0,943385 | C | -2,097432 | 1,683201 | -0,392832 |
| H | 0,226072  | 1,956303 | -1,258515 | H | -0,218576 | 1,857518 | -1,446451 |
| H | -0,654942 | 3,169472 | -0,271398 | H | -0,304671 | 2,801557 | 0,035713  |
| H | -2,707286 | 1,783589 | -0,285748 | H | -2,479382 | 1,639222 | 0,631273  |
| H | -2,204196 | 1,695472 | -1,971178 | H | -2,586272 | 2,523272 | -0,890804 |
| H | -1,816141 | 0,377791 | -0,877156 | H | -2,411559 | 0,773809 | -0,910533 |
| H | -0,353085 | 1,608226 | 0,961646  | H | -0,173062 | 0,732133 | 1,381646  |

| 1N C2H4 CC<br>TS |             |           |           | 1N C2H4<br>CC<br>Product |             |           |           |
|------------------|-------------|-----------|-----------|--------------------------|-------------|-----------|-----------|
| 18               |             |           |           | 18                       |             |           |           |
| E(SCF)=          | -289,993344 |           |           | E(SCF)=                  | -290,066604 |           |           |
| N                | -0,136552   | 0,408360  | 0,006977  | C                        | 1,468229    | 0,553007  | -0,757626 |
| C                | -0,027914   | 0,042035  | 1,436732  | C                        | 0,120076    | 0,129508  | -1,366773 |
| C                | 1,484331    | -0,201035 | 1,586532  | N                        | -0,820345   | 0,392556  | -0,271431 |
| C                | 2,086468    | 0,528978  | 0,362802  | C                        | -0,162780   | -0,111395 | 0,921250  |
| C                | 0,988635    | 0,563804  | -0,679204 | C                        | 1,296362    | 0,314157  | 0,768226  |
| C                | 1,237111    | -0,543039 | -2,273859 | H                        | -1,729968   | -0,027982 | -0,422930 |
| C                | 1,573699    | -1,752461 | -1,708738 | H                        | -0,146165   | 0,708697  | -2,252519 |
| H                | -1,042894   | 0,483292  | -0,431501 | H                        | 0,154241    | -0,934073 | -1,650317 |
| H                | -0,387000   | 0,863588  | 2,063731  | H                        | 1,653309    | 1,609224  | -0,955449 |
| H                | -0,629350   | -0,844240 | 1,656647  | H                        | 2,298578    | -0,012959 | -1,180852 |
| H                | 1,864632    | 0,159960  | 2,542493  | H                        | 1,487054    | 1,232950  | 1,325831  |
| H                | 1,699780    | -1,268051 | 1,512048  | H                        | 1,974162    | -0,450682 | 1,148567  |
| H                | 2,308315    | 1,574522  | 0,610139  | C                        | -0,875832   | -0,151091 | 2,228055  |
| H                | 3,005885    | 0,077099  | -0,002348 | C                        | -0,525493   | -1,452762 | 1,523410  |
| H                | 0,249102    | -0,406533 | -2,697990 | H                        | -0,325501   | 0,109503  | 3,124279  |
| H                | 1,997009    | 0,039770  | -2,777900 | H                        | -1,917512   | 0,147485  | 2,245556  |
| H                | 0,815421    | -2,437532 | -1,351009 | H                        | 0,257905    | -2,069177 | 1,948586  |
| H                | 2,602996    | -2,008809 | -1,494440 | H                        | -1,339490   | -2,010642 | 1,074096  |

| 1N C2H4 CH<br>TS |             |           |           | 1N C2H4<br>CH<br>Product |             |           |           |
|------------------|-------------|-----------|-----------|--------------------------|-------------|-----------|-----------|
| 18               |             |           |           | 18                       |             |           |           |
| E(SCF)=          | -289,964844 |           |           | E(SCF)=                  | -290,078249 |           |           |
| N                | 0,411352    | 0,644760  | 1,269296  | N                        | 0,479470    | 0,676157  | 1,357675  |
| C                | 1,695509    | 0,687054  | 0,910917  | C                        | 1,740390    | 0,987589  | 0,686701  |
| C                | 1,887293    | -0,359194 | -0,155113 | C                        | 1,920775    | -0,234253 | -0,239818 |
| C                | 0,467099    | -0,589232 | -0,722859 | C                        | 0,490979    | -0,507862 | -0,728500 |
| C                | -0,454221   | -0,230775 | 0,455701  | C                        | -0,388578   | -0,137583 | 0,482232  |
| C                | 2,019885    | 2,718598  | -0,331600 | C                        | 1,798520    | 2,288545  | -0,083923 |
| C                | 0,875395    | 3,375053  | -0,394655 | C                        | 0,796758    | 3,132147  | -0,303213 |
| H                | 0,048925    | 1,170266  | 2,048261  | H                        | 0,020849    | 1,485713  | 1,749845  |
| H                | -1,360827   | 0,292013  | 0,145222  | H                        | -1,288292   | 0,400888  | 0,166360  |
| H                | -0,748265   | -1,111189 | 1,035922  | H                        | -0,719226   | -1,032457 | 1,019053  |
| H                | 0,291247    | 0,097772  | -1,550941 | H                        | 0,259355    | 0,137777  | -1,577565 |
| H                | 0,303592    | -1,606604 | -1,077353 | H                        | 0,347318    | -1,540245 | -1,048939 |
| H                | 2,613734    | -0,061151 | -0,907331 | H                        | 2,623836    | -0,047291 | -1,052115 |
| H                | 2,258825    | -1,270191 | 0,329531  | H                        | 2,294948    | -1,075433 | 0,347588  |
| H                | 2,892030    | 3,012303  | -0,918840 | H                        | 2,783867    | 2,530281  | -0,479382 |
| H                | 0,010349    | 3,052223  | 0,191818  | H                        | -0,204432   | 2,946007  | 0,069574  |
| H                | 0,702049    | 4,258484  | -1,010794 | H                        | 0,939886    | 4,046022  | -0,866145 |
| H                | 2,280376    | 1,688876  | 0,877563  | H                        | 2,551726    | 1,013498  | 1,424410  |

| 1N C2H2 CC<br>TS | ***first and<br>highest TS,<br>multistep<br>reaction!*** |           |           | 1N C2H2<br>CC<br>Product | ***last and<br>lowest lying<br>product of<br>multistep<br>reaction** |           |           |
|------------------|----------------------------------------------------------|-----------|-----------|--------------------------|----------------------------------------------------------------------|-----------|-----------|
| 16               |                                                          |           |           | 16                       |                                                                      |           |           |
| E(SCF)=          | -288,735528                                              |           |           | E(SCF)=                  | -288,799447                                                          |           |           |
| N                | 0,484602                                                 | 1,167820  | -0,115358 | N                        | -0,194796                                                            | -1,105429 | -0,367955 |
| C                | 1,705144                                                 | 0,604149  | 0,509820  | C                        | -1,528776                                                            | -0,917299 | 0,201496  |
| C                | 1,476411                                                 | -0,905076 | 0,334296  | C                        | -1,754631                                                            | 0,587301  | 0,014839  |
| C                | 0,419202                                                 | -0,977306 | -0,795385 | C                        | -0,373327                                                            | 1,179957  | 0,333067  |
| C                | -0,310265                                                | 0,349591  | -0,778050 | C                        | 0,620520                                                             | 0,076816  | -0,067302 |
| C                | -2,225927                                                | 0,276704  | -0,174710 | C                        | 1,898031                                                             | 0,300398  | -0,795716 |
| C                | -2,311127                                                | -0,413457 | 0,850109  | C                        | 2,011256                                                             | -0,037748 | 0,455656  |
| H                | 0,260832                                                 | 2,145897  | 0,000852  | H                        | 0,255503                                                             | -1,969939 | -0,096784 |
| H                | 2,593101                                                 | 0,960731  | -0,020327 | H                        | -2,268710                                                            | -1,523724 | -0,325641 |
| H                | 1,781815                                                 | 0,915295  | 1,554061  | H                        | -1,584650                                                            | -1,172361 | 1,272005  |
| H                | 2,399200                                                 | -1,436313 | 0,101851  | H                        | -2,025362                                                            | 0,787695  | -1,024078 |
| H                | 1,065421                                                 | -1,330193 | 1,251889  | H                        | -2,549274                                                            | 0,975803  | 0,652994  |
| H                | 0,901148                                                 | -1,052092 | -1,777569 | H                        | -0,175119                                                            | 2,112667  | -0,196419 |
| H                | -0,260358                                                | -1,821750 | -0,707018 | H                        | -0,282600                                                            | 1,385827  | 1,403593  |
| H                | -2,756243                                                | 0,872043  | -0,886360 | H                        | 2,381171                                                             | 0,506495  | -1,737673 |
| H                | -1,903484                                                | -1,035837 | 1,614906  | H                        | 2,661985                                                             | -0,308278 | 1,273524  |

| 1N C2H2 CH<br>TS |             |           |           | 1N C2H2<br>CH<br>Product |             |           |           |
|------------------|-------------|-----------|-----------|--------------------------|-------------|-----------|-----------|
| 16               |             |           |           | 16                       |             |           |           |
| E(SCF)=          | -288,726394 |           |           | E(SCF)=                  | -288,825509 |           |           |
| C                | 0,278831    | 0,306800  | 0,900203  | C                        | -0,368945   | 0,213154  | 0,780791  |
| C                | 1,698575    | 0,227757  | 0,440495  | C                        | 0,584315    | 1,286045  | 0,173558  |
| C                | 1,610784    | -0,304644 | -1,010720 | C                        | 1,694834    | 0,479596  | -0,547936 |
| C                | 0,152428    | -0,035221 | -1,423066 | C                        | 1,205288    | -0,973009 | -0,502264 |
| N                | -0,511743   | 0,108929  | -0,112386 | N                        | 0,452472    | -1,010499 | 0,755581  |
| C                | -0,323299   | 2,566283  | 2,114191  | C                        | -1,626725   | 0,090332  | 0,027275  |
| C                | -0,445623   | 3,781014  | 2,017812  | C                        | -2,656983   | -0,049810 | -0,577353 |
| H                | -1,510260   | 0,256505  | -0,030487 | H                        | -0,113324   | -1,845457 | 0,852262  |
| H                | 0,035654    | 0,898094  | -1,980330 | H                        | 0,579790    | -1,192466 | -1,380392 |
| H                | -0,300689   | -0,844087 | -1,995143 | H                        | 2,021625    | -1,696566 | -0,477010 |
| H                | 2,317279    | 0,180561  | -1,681376 | H                        | 1,862123    | 0,822895  | -1,569053 |
| H                | 1,811634    | -1,376264 | -1,031671 | H                        | 2,637211    | 0,570147  | -0,006843 |
| H                | 2,107361    | 1,240091  | 0,502617  | H                        | 0,040604    | 1,941305  | -0,504616 |
| H                | 2,301686    | -0,395412 | 1,102492  | H                        | 1,000265    | 1,903784  | 0,968717  |
| H                | -0,087013   | 0,890932  | 1,824717  | H                        | -0,619049   | 0,456370  | 1,816373  |
| H                | -0,564614   | 4,839548  | 1,999477  | H                        | -3,567255   | -0,164370 | -1,112932 |

| 1N CH3F CF<br>TS |             |           |           | 1N CH3F<br>CF<br>Product |             |           |           |
|------------------|-------------|-----------|-----------|--------------------------|-------------|-----------|-----------|
| 17               |             |           |           | 17                       |             |           |           |
| E(SCF)=          | -351,121460 |           |           | E(SCF)=                  | -351,286513 |           |           |
| C                | 1,388026    | 0,905280  | -0,185607 | C                        | 0,304144    | -1,061184 | -0,596231 |
| C                | 0,114892    | 0,134969  | 0,035059  | C                        | -0,615154   | 0,022212  | -0,040497 |
| N                | 0,114556    | -0,237619 | 1,288353  | N                        | 0,215413    | 1,163179  | -0,001280 |
| C                | 1,354595    | 0,007381  | 2,067779  | C                        | 1,603401    | 0,791758  | 0,322237  |
| C                | 2,325069    | 0,473036  | 0,970856  | C                        | 1,662811    | -0,731616 | 0,049147  |

|   |           |           |           |   |           |           |           |
|---|-----------|-----------|-----------|---|-----------|-----------|-----------|
| C | -1,004230 | -0,846991 | -1,496665 | C | -1,940042 | 0,243258  | -0,738330 |
| F | 0,635235  | -1,568827 | -1,085778 | F | -0,963212 | -0,402399 | 1,316190  |
| H | -0,647197 | -0,763536 | 1,692644  | H | -0,163683 | 1,946110  | 0,512873  |
| H | 1,170097  | 0,772517  | 2,827251  | H | 2,292770  | 1,351154  | -0,315081 |
| H | 1,673763  | -0,907434 | 2,568999  | H | 1,858422  | 1,011391  | 1,363186  |
| H | 2,981689  | 1,272242  | 1,312987  | H | 2,501544  | -1,003160 | -0,591324 |
| H | 2,942380  | -0,362718 | 0,642703  | H | 1,770913  | -1,276851 | 0,986316  |
| H | 1,140326  | 1,972195  | -0,125890 | H | 0,345223  | -0,967270 | -1,683341 |
| H | 1,801150  | 0,714998  | -1,172549 | H | -0,063787 | -2,055653 | -0,348806 |
| H | -0,993261 | 0,075790  | -2,058115 | H | -2,545763 | -0,661952 | -0,695665 |
| H | -0,988193 | -1,718227 | -2,145068 | H | -2,494338 | 1,047064  | -0,250361 |
| H | -1,831575 | -0,889027 | -0,800291 | H | -1,773940 | 0,516216  | -1,780516 |

| <b>1N CH3F CH<br/>TS</b> |             |           |           | <b>1N CH3F<br/>CH<br/>Product</b> |             |           |           |
|--------------------------|-------------|-----------|-----------|-----------------------------------|-------------|-----------|-----------|
| 17                       |             |           |           | 17                                |             |           |           |
| E(SCF)=                  | -351,147180 |           |           | E(SCF)=                           | -351,261850 |           |           |
| C                        | 1,560980    | -0,458994 | 0,652059  | C                                 | 0,302607    | 1,117166  | 0,555454  |
| C                        | 1,367013    | 0,652466  | -0,408793 | C                                 | 1,416988    | 0,973925  | -0,492084 |
| C                        | 0,051520    | 0,268017  | -1,108874 | C                                 | 1,936213    | -0,454020 | -0,258795 |
| N                        | -0,592733   | -0,598789 | -0,107210 | N                                 | 0,820431    | -1,179678 | 0,384061  |
| C                        | 0,169669    | -0,955799 | 0,932331  | C                                 | -0,322906   | -0,284166 | 0,606920  |
| C                        | -0,302684   | 0,413604  | 2,922932  | C                                 | -1,409656   | -0,485072 | -0,445322 |
| F                        | 0,937290    | 0,625834  | 3,539606  | F                                 | -2,537289   | 0,291689  | -0,140294 |
| H                        | -1,544827   | -0,909837 | -0,214648 | H                                 | 0,578232    | -2,045130 | -0,077032 |
| H                        | -0,574942   | 1,132016  | -1,342808 | H                                 | 2,250689    | -0,935492 | -1,188537 |
| H                        | 0,222035    | -0,288842 | -2,035832 | H                                 | 2,803745    | -0,443881 | 0,409420  |
| H                        | 1,255988    | 1,616832  | 0,088963  | H                                 | 1,006359    | 1,073588  | -1,499926 |
| H                        | 2,197722    | 0,728736  | -1,109593 | H                                 | 2,197640    | 1,727600  | -0,383711 |
| H                        | 2,064355    | -0,118238 | 1,554082  | H                                 | -0,432084   | 1,884440  | 0,311082  |
| H                        | 2,144102    | -1,291035 | 0,240128  | H                                 | 0,728002    | 1,360761  | 1,531430  |
| H                        | -0,229160   | -0,968035 | 2,013592  | H                                 | -0,775254   | -0,475038 | 1,585066  |
| H                        | -0,622675   | 1,336412  | 2,434678  | H                                 | -1,068564   | -0,192340 | -1,441726 |
| H                        | -1,015525   | 0,079018  | 3,682376  | H                                 | -1,735648   | -1,528964 | -0,468873 |

| <b>1N CH3Cl<br/>CCl TS</b> |             |           |           | <b>1N CH3Cl<br/>CCl<br/>Product</b> |             |           |           |
|----------------------------|-------------|-----------|-----------|-------------------------------------|-------------|-----------|-----------|
| 17                         |             |           |           | 17                                  |             |           |           |
| E(SCF)=                    | -711,478770 |           |           | E(SCF)=                             | -711,626592 |           |           |
| C                          | 0,104914    | 0,204090  | 0,083609  | C                                   | 0,277136    | 0,463854  | 0,107961  |
| N                          | 0,118934    | -0,191553 | 1,322500  | N                                   | -0,590091   | 0,799758  | -0,913272 |
| C                          | 1,373709    | 0,020042  | 2,093422  | C                                   | -1,818494   | -0,004666 | -0,876573 |
| C                          | 2,334862    | 0,513268  | 0,999436  | C                                   | -1,849440   | -0,565104 | 0,567617  |
| C                          | 1,393944    | 0,943508  | -0,154936 | C                                   | -0,637559   | 0,082523  | 1,263757  |
| C                          | -1,130393   | -0,841541 | -1,572618 | C                                   | 1,400530    | 1,438622  | 0,364559  |
| Cl                         | 0,904105    | -2,065833 | -1,235350 | Cl                                  | 1,260314    | -1,262197 | -0,348989 |
| H                          | -0,643820   | -0,716122 | 1,729227  | H                                   | -0,186712   | 0,991688  | -1,818729 |
| H                          | 1,198689    | 0,758982  | 2,879709  | H                                   | -2,679513   | 0,627802  | -1,101937 |
| H                          | 1,686426    | -0,916170 | 2,557034  | H                                   | -1,786237   | -0,814009 | -1,611392 |
| H                          | 2,976006    | 1,320999  | 1,350176  | H                                   | -2,784528   | -0,333480 | 1,076359  |
| H                          | 2,965183    | -0,308131 | 0,662193  | H                                   | -1,734780   | -1,647413 | 0,550614  |
| H                          | 1,157660    | 2,014113  | -0,112152 | H                                   | -0,923780   | 1,007353  | 1,774634  |
| H                          | 1,798947    | 0,734576  | -1,141846 | H                                   | -0,147464   | -0,568802 | 1,982189  |



|   |           |           |           |   |          |          |           |
|---|-----------|-----------|-----------|---|----------|----------|-----------|
| H | -0,982805 | 0,084009  | -2,104110 | H | 2,062467 | 1,066480 | 1,143721  |
| H | -1,181246 | -1,713159 | -2,203140 | H | 1,992263 | 1,600206 | -0,536514 |
| H | -1,897792 | -0,807048 | -0,816486 | H | 0,973953 | 2,394671 | 0,680624  |

| 1N CH3Cl<br>CH TS |             |           |           | 1N CH3Cl<br>CH<br>Product |             |           |           |
|-------------------|-------------|-----------|-----------|---------------------------|-------------|-----------|-----------|
| 17                |             |           |           | 17                        |             |           |           |
| done:             | -711,500170 |           |           | E(SCF)=                   | -711,607338 |           |           |
| C                 | 0,202210    | -0,899046 | 0,917918  | C                         | 0,273754    | -0,727283 | 1,283464  |
| C                 | 1,581138    | -0,392684 | 0,607379  | C                         | 1,647905    | -0,362737 | 0,707337  |
| C                 | 1,366245    | 0,655405  | -0,512550 | C                         | 1,319178    | 0,671211  | -0,381773 |
| C                 | 0,044323    | 0,224596  | -1,171603 | C                         | -0,046207   | 0,212685  | -0,929493 |
| N                 | -0,578061   | -0,591061 | -0,113195 | N                         | -0,582039   | -0,707988 | 0,093992  |
| C                 | -0,349694   | 0,401303  | 3,013738  | C                         | -0,228009   | 0,257597  | 2,342519  |
| Cl                | 1,100190    | 0,396770  | 4,103990  | Cl                        | 0,716245    | 0,140685  | 3,908150  |
| H                 | -1,539528   | -0,888792 | -0,173334 | H                         | -1,567069   | -0,592576 | 0,285521  |
| H                 | -0,596530   | 1,067137  | -1,439568 | H                         | -0,710267   | 1,062737  | -1,114856 |
| H                 | 0,202310    | -0,382763 | -2,067949 | H                         | 0,068570    | -0,320160 | -1,878547 |
| H                 | 1,256396    | 1,646861  | -0,071119 | H                         | 1,242206    | 1,669952  | 0,053687  |
| H                 | 2,187196    | 0,694391  | -1,227299 | H                         | 2,083750    | 0,718304  | -1,157436 |
| H                 | 2,076348    | -0,000593 | 1,493594  | H                         | 2,330909    | 0,011246  | 1,468999  |
| H                 | 2,179814    | -1,236874 | 0,245899  | H                         | 2,094658    | -1,254665 | 0,263864  |
| H                 | -0,189298   | -0,917136 | 2,002558  | H                         | 0,282881    | -1,726035 | 1,727758  |
| H                 | -0,462671   | 1,402590  | 2,603469  | H                         | -0,146992   | 1,291951  | 2,015257  |
| H                 | -1,216153   | 0,113403  | 3,608641  | H                         | -1,260301   | 0,043773  | 2,612638  |

\*\*\*\*\*

**Now reaction scheme molecules  
 1P without hydrogen (see above)**

| 1P B3LYP/TZVP |             |           |           |
|---------------|-------------|-----------|-----------|
| 12            |             |           |           |
| E(SCF)=       | -497,937017 |           |           |
| C             | 0,986923    | -1,109263 | -0,846778 |
| C             | 0,099152    | 0,101947  | -1,264092 |
| C             | -0,921058   | 0,419195  | -0,144114 |
| P             | -0,213100   | -0,506704 | 1,341480  |
| C             | 1,233663    | -1,173611 | 0,632619  |
| H             | 0,217261    | 0,407639  | 2,328617  |
| H             | -1,034140   | 1,487548  | 0,036581  |
| H             | -1,909017   | 0,013006  | -0,363176 |
| H             | 0,754137    | 0,965638  | -1,400187 |
| H             | -0,400779   | -0,073933 | -2,219298 |
| H             | 1,931455    | -1,119694 | -1,397791 |
| H             | 0,514081    | -2,072606 | -1,103786 |

  

| 1P CH4 TS |             |          |           | 1P CH4<br>Product |             |           |           |
|-----------|-------------|----------|-----------|-------------------|-------------|-----------|-----------|
| 17        |             |          |           | 17                |             |           |           |
| E(SCF)=   | -538,457822 |          |           | done:             | -538,598259 |           |           |
| P         | -1,240543   | 0,257468 | -0,070176 | P                 | 0,370370    | -1,369055 | 0,058878  |
| C         | 0,137905    | 0,197063 | -1,383307 | C                 | 1,571114    | -0,019357 | -0,543157 |

|   |           |           |           |   |           |           |           |
|---|-----------|-----------|-----------|---|-----------|-----------|-----------|
| C | 1,400788  | 0,633909  | -0,625121 | C | 0,850685  | 1,337141  | -0,408947 |
| C | 1,316946  | 0,024882  | 0,790026  | C | -0,164139 | 1,233333  | 0,736681  |
| C | -0,083677 | 0,047879  | 1,343495  | C | -0,937914 | -0,086373 | 0,571429  |
| H | -1,656159 | -1,104693 | -0,094233 | H | 0,939024  | -1,517673 | 1,360338  |
| H | 0,244854  | -0,815701 | -1,775375 | H | 2,473981  | -0,055574 | 0,067110  |
| H | -0,092941 | 0,859428  | -2,217300 | H | 1,867654  | -0,220323 | -1,572490 |
| H | 2,310447  | 0,327526  | -1,148662 | H | 1,560619  | 2,150768  | -0,240960 |
| H | 1,429446  | 1,725315  | -0,551031 | H | 0,327705  | 1,568255  | -1,340578 |
| H | 1,535070  | -1,052030 | 0,719638  | H | 0,367593  | 1,222828  | 1,692909  |
| H | 2,058974  | 0,430447  | 1,481917  | H | -0,840237 | 2,094514  | 0,753115  |
| H | -0,251055 | 0,941517  | 2,260363  | H | -1,360205 | -0,405274 | 1,526986  |
| C | -0,164194 | 2,213262  | 2,206549  | C | -2,067485 | -0,002649 | -0,460937 |
| H | 0,299433  | 2,654770  | 1,333375  | H | -1,697197 | 0,266506  | -1,453331 |
| H | 0,426788  | 2,381823  | 3,106482  | H | -2,802816 | 0,752263  | -0,167375 |
| H | -1,201323 | 2,520134  | 2,313382  | H | -2,586274 | -0,957993 | -0,557425 |

| 1P NH3 TS |             |           |           | 1P NH3 Product |             |           |           |
|-----------|-------------|-----------|-----------|----------------|-------------|-----------|-----------|
| 16        |             |           |           | 16             |             |           |           |
| E(SCF)=   | -554,513677 |           |           | done:          | -554,638462 |           |           |
| C         | 0,539244    | 0,244113  | -1,705214 | C              | -0,961358   | -0,042589 | 0,503695  |
| C         | 1,786455    | 0,621090  | -0,958673 | C              | -0,171422   | 1,250937  | 0,734259  |
| C         | 1,963086    | 2,150639  | -0,885269 | C              | 0,897719    | 1,355620  | -0,360491 |
| C         | 1,561108    | 2,717052  | -2,255869 | C              | 1,616509    | -0,004794 | -0,462578 |
| P         | 0,065404    | 1,659145  | -2,773827 | P              | 0,363926    | -1,351719 | 0,033008  |
| N         | -0,990858   | 0,205184  | -0,212689 | N              | -2,001347   | 0,153251  | -0,507270 |
| H         | 0,559241    | 1,100607  | -3,987902 | H              | 0,855422    | -1,557446 | 1,358914  |
| H         | 2,372426    | 2,612000  | -2,978001 | H              | 2,470357    | -0,052673 | 0,213717  |
| H         | 1,288250    | 3,770670  | -2,204492 | H              | 1,989110    | -0,194048 | -1,469107 |
| H         | 2,984328    | 2,432631  | -0,616583 | H              | 1,603050    | 2,164124  | -0,154224 |
| H         | 1,303909    | 2,554389  | -0,110234 | H              | 0,425452    | 1,599791  | -1,317154 |
| H         | 2,592757    | 0,202384  | -1,581271 | H              | 0,316102    | 1,201035  | 1,711784  |
| H         | 1,878968    | 0,121423  | 0,009183  | H              | -0,843525   | 2,112802  | 0,739600  |
| H         | -0,398937   | -0,405276 | -1,035566 | H              | -1,453801   | -0,366134 | 1,421949  |
| H         | -1,607364   | 0,921330  | -0,575653 | H              | -2,501367   | -0,710236 | -0,686062 |
| H         | -0,472951   | 0,547049  | 0,586392  | H              | -1,608035   | 0,453202  | -1,392668 |

| 1P OH2 TS |             |           |           | 1P OH2 Product |             |           |           |
|-----------|-------------|-----------|-----------|----------------|-------------|-----------|-----------|
| 15        |             |           |           | 15             |             |           |           |
| done:     | -574,400123 |           |           | done:          | -574,516319 |           |           |
| C         | -1,209686   | 0,361476  | -0,101406 | C              | -0,956714   | -0,015740 | 0,479771  |
| P         | 0,105021    | 0,333987  | -1,354385 | P              | 0,325164    | -1,385164 | 0,144003  |
| C         | 1,470583    | 0,740683  | -0,108347 | C              | 1,655050    | -0,115096 | -0,338454 |
| C         | 0,719688    | 1,565204  | 0,949674  | C              | 0,958043    | 1,257164  | -0,408575 |
| C         | -0,641503   | 0,880522  | 1,174003  | C              | -0,159057   | 1,273683  | 0,640146  |
| O         | -2,615897   | 1,881362  | -0,640123 | O              | -1,824574   | 0,152041  | -0,646647 |
| H         | 0,188841    | -1,080355 | -1,485436 | H              | 0,707426    | -1,553643 | 1,508912  |
| H         | 1,891782    | -0,170269 | 0,320626  | H              | 2,443816    | -0,124227 | 0,414621  |
| H         | 2,274194    | 1,301799  | -0,583191 | H              | 2,105317    | -0,393412 | -1,290758 |
| H         | 1,294355    | 1,648484  | 1,874687  | H              | 1,669460    | 2,071762  | -0,254010 |
| H         | 0,548048    | 2,578912  | 0,578209  | H              | 0,515715    | 1,394879  | -1,397048 |
| H         | -0,492950   | -0,035878 | 1,770762  | H              | 0,269040    | 1,300357  | 1,646401  |
| H         | -1,359876   | 1,487660  | 1,726677  | H              | -0,816120   | 2,140419  | 0,532567  |

Supplementary Material (ESI) for New Journal of Chemistry  
 This journal is © The Royal Society of Chemistry and  
 The Centre National de la Recherche Scientifique, 2010

|   |           |          |           |   |           |           |           |
|---|-----------|----------|-----------|---|-----------|-----------|-----------|
| H | -2,413222 | 0,732577 | -0,395499 | H | -1,536247 | -0,250521 | 1,379058  |
| H | -2,510142 | 1,946867 | -1,599544 | H | -2,210395 | -0,702578 | -0,869902 |

| 1P SiH4 TS |             |           |           | 1P SiH4 Product |             |           |           |
|------------|-------------|-----------|-----------|-----------------|-------------|-----------|-----------|
| 17         |             |           |           | 17              |             |           |           |
| done:      | -789,843318 |           |           | done:           | -789,982916 |           |           |
| C          | 0,397122    | -1,116820 | 0,892315  | C               | -0,433032   | -0,101925 | 0,763608  |
| P          | -0,910570   | -0,672386 | -0,282175 | P               | 0,748138    | -1,382278 | 0,008744  |
| C          | 0,212086    | 0,280480  | -1,475821 | C               | 1,829170    | -0,024087 | -0,769734 |
| C          | 1,294377    | 0,815236  | -0,525880 | C               | 1,177564    | 1,338683  | -0,458212 |
| C          | 1,596415    | -0,314019 | 0,484598  | C               | 0,371303    | 1,211821  | 0,839854  |
| Si         | -0,592172   | 0,648564  | 3,249635  | Si              | -2,054147   | -0,002521 | -0,233237 |
| H          | -1,074117   | -1,945972 | -0,888021 | H               | 1,541113    | -1,563469 | 1,184463  |
| H          | -0,331156   | 1,075802  | -1,984465 | H               | 1,915427    | -0,193782 | -1,842648 |
| H          | 0,637210    | -0,386241 | -2,228563 | H               | 2,831826    | -0,096407 | -0,347880 |
| H          | 0,916103    | 1,688919  | 0,013252  | H               | 0,506710    | 1,615736  | -1,275635 |
| H          | 2,189205    | 1,131414  | -1,067786 | H               | 1,927025    | 2,130551  | -0,385519 |
| H          | 2,224357    | -0,003230 | 1,323960  | H               | -0,269275   | 2,085406  | 0,996233  |
| H          | 2,179846    | -1,097874 | -0,032174 | H               | 1,056521    | 1,163353  | 1,692766  |
| H          | -0,045056   | -0,503206 | 2,355142  | H               | -0,715438   | -0,451732 | 1,760308  |
| H          | 0,138974    | 0,635021  | 4,546797  | H               | -2,889310   | 1,127579  | 0,268338  |
| H          | -0,403166   | 1,970467  | 2,593147  | H               | -1,793328   | 0,222088  | -1,683077 |
| H          | -2,040634   | 0,399656  | 3,470666  | H               | -2,817578   | -1,270595 | -0,082980 |

| 1P C6H6 CC TS |             |           |           | 1P C6H6 CC Product |             |           |           |
|---------------|-------------|-----------|-----------|--------------------|-------------|-----------|-----------|
| 24            |             |           |           | 24                 |             |           |           |
| done:         | -730,252480 |           |           | done:              | -730,328295 |           |           |
| C             | 2,035597    | 0,802556  | -1,042664 | C                  | 1,962126    | 0,265186  | -1,267844 |
| C             | 0,999039    | 1,334633  | -0,219870 | C                  | 0,903915    | 1,092589  | -0,668811 |
| C             | 0,777426    | 0,718979  | 1,035498  | C                  | 0,717194    | 0,953012  | 0,876022  |
| C             | 1,421144    | -0,476744 | 1,365879  | C                  | 1,623402    | 0,017958  | 1,551700  |
| C             | 2,328042    | -1,041913 | 0,491384  | C                  | 2,457792    | -0,790785 | 0,872948  |
| C             | 2,649537    | -0,375997 | -0,712259 | C                  | 2,630501    | -0,664569 | -0,560529 |
| C             | -0,843464   | 0,649136  | -0,949012 | C                  | -0,360394   | 0,508487  | -0,100504 |
| C             | -1,989569   | 1,097758  | -0,082328 | C                  | -1,631904   | 1,344955  | -0,153667 |
| C             | -2,635918   | -0,046603 | 0,726407  | C                  | -2,693393   | 0,584667  | 0,645483  |
| C             | -2,622317   | -1,290048 | -0,176256 | C                  | -2,642596   | -0,893912 | 0,213145  |
| P             | -0,946079   | -1,164083 | -1,069423 | P                  | -0,844058   | -1,295852 | -0,274324 |
| H             | -1,345069   | -1,203093 | -2,435725 | H                  | -1,041493   | -1,231608 | -1,688173 |
| H             | -3,443428   | -1,264929 | -0,895079 | H                  | -3,291616   | -1,079900 | -0,643322 |
| H             | -2,693771   | -2,217345 | 0,391626  | H                  | -2,962665   | -1,559361 | 1,014869  |
| H             | -3,648888   | 0,202559  | 1,055157  | H                  | -3,690555   | 1,009456  | 0,504289  |
| H             | -2,039510   | -0,234735 | 1,623935  | H                  | -2,461012   | 0,662407  | 1,711405  |
| H             | -2,716306   | 1,431058  | -0,843178 | H                  | -1,953868   | 1,451605  | -1,196091 |
| H             | -1,773833   | 1,988860  | 0,513270  | H                  | -1,469452   | 2,353584  | 0,239516  |
| H             | 0,706964    | 2,363017  | -0,366498 | H                  | 0,782576    | 2,082630  | -1,098938 |
| H             | 0,116476    | 1,186660  | 1,752466  | H                  | 0,467915    | 1,852634  | 1,430452  |
| H             | 1,209177    | -0,954598 | 2,314790  | H                  | 1,627600    | 0,019454  | 2,636090  |
| H             | 2,820504    | -1,973397 | 0,740114  | H                  | 3,091809    | -1,486707 | 1,409106  |
| H             | 3,405114    | -0,794915 | -1,366262 | H                  | 3,389006    | -1,268977 | -1,043648 |
| H             | 2,293403    | 1,317932  | -1,959312 | H                  | 2,223565    | 0,457599  | -2,302385 |

| 1P C6H6 CH<br>TS |             |           |           | 1P C6H6<br>CH<br>Product |             |           |           |
|------------------|-------------|-----------|-----------|--------------------------|-------------|-----------|-----------|
| 24               |             |           |           | 24                       |             |           |           |
| done:            | -730,250239 |           |           | done:                    | -730,391623 |           |           |
| P                | -0,251594   | -0,963347 | 1,099815  | P                        | -1,832613   | -1,083083 | -0,876744 |
| H                | 0,503782    | -2,169689 | 1,055441  | H                        | -2,783234   | -0,543092 | -1,794534 |
| C                | -0,312791   | -0,532751 | -0,753575 | C                        | -2,735317   | -0,533126 | 0,707374  |
| H                | 0,206304    | -1,295058 | -1,337107 | H                        | -3,783856   | -0,351941 | 0,469371  |
| H                | -1,343888   | -0,482841 | -1,102206 | H                        | -2,704097   | -1,333527 | 1,446961  |
| C                | 0,400130    | 0,825215  | -0,847664 | C                        | -2,040829   | 0,744593  | 1,216970  |
| H                | -0,289214   | 1,626370  | -0,566621 | H                        | -1,231549   | 0,476097  | 1,900299  |
| H                | 0,740038    | 1,029593  | -1,866651 | H                        | -2,731127   | 1,377024  | 1,780969  |
| C                | 1,568999    | 0,798784  | 0,156451  | C                        | -1,459825   | 1,490506  | 0,012033  |
| H                | 2,035347    | 1,774202  | 0,304127  | H                        | -0,793345   | 2,300238  | 0,320932  |
| H                | 2,366572    | 0,152557  | -0,243283 | H                        | -2,272950   | 1,938639  | -0,566915 |
| C                | 1,199103    | 0,107205  | 1,441114  | C                        | -0,720528   | 0,466307  | -0,884692 |
| C                | 0,185628    | 1,857297  | 2,584381  | C                        | 0,708896    | 0,212418  | -0,448334 |
| C                | 0,717300    | 3,132237  | 2,467503  | C                        | 1,737898    | 0,973869  | -1,013637 |
| C                | -0,021958   | 4,220713  | 2,927096  | C                        | 3,059972    | 0,811785  | -0,615364 |
| C                | -1,277405   | 4,018526  | 3,494334  | C                        | 3,384459    | -0,121568 | 0,364004  |
| C                | -1,793866   | 2,730738  | 3,610194  | C                        | 2,375643    | -0,891737 | 0,931520  |
| C                | -1,058681   | 1,639526  | 3,149636  | C                        | 1,054234    | -0,727273 | 0,526923  |
| H                | 1,700969    | 3,286262  | 2,039132  | H                        | 1,497789    | 1,702630  | -1,780385 |
| H                | 0,382686    | 5,222513  | 2,844270  | H                        | 3,837177    | 1,411689  | -1,073761 |
| H                | -1,852769   | 4,865489  | 3,847865  | H                        | 4,413592    | -0,253127 | 0,674982  |
| H                | -2,769808   | 2,574644  | 4,054496  | H                        | 2,616525    | -1,630291 | 1,686808  |
| H                | -1,458856   | 0,634638  | 3,222692  | H                        | 0,291048    | -1,359179 | 0,965289  |
| H                | 1,007737    | 0,904779  | 2,457505  | H                        | -0,692891   | 0,834959  | -1,911607 |

| 1P C2H6 CC<br>TS |             |           |           | 1P C2H6<br>CC<br>Product |             |           |           |
|------------------|-------------|-----------|-----------|--------------------------|-------------|-----------|-----------|
| 20               |             |           |           | 20                       |             |           |           |
| done:            | -577,695649 |           |           | done:                    | -577,924778 |           |           |
| P                | -0,309885   | 0,062033  | -0,321301 | P                        | -0,445419   | -1,331674 | 0,104305  |
| C                | 0,152605    | -0,394928 | 1,485749  | C                        | -1,921739   | -0,135120 | 0,128665  |
| C                | 1,657796    | -0,098077 | 1,661191  | C                        | -1,364635   | 1,306033  | 0,122973  |
| C                | 2,075724    | 0,974664  | 0,620622  | C                        | 0,026707    | 1,287071  | -0,517969 |
| C                | 1,279475    | 0,915161  | -0,656091 | C                        | 0,825935    | 0,095435  | 0,047141  |
| H                | -0,988850   | 1,281181  | -0,025345 | H                        | -0,454585   | -1,562959 | -1,305184 |
| H                | -0,455318   | 0,205897  | 2,163105  | H                        | -2,540452   | -0,330049 | -0,747691 |
| H                | -0,079162   | -1,441517 | 1,682283  | H                        | -2,539362   | -0,325434 | 1,006359  |
| H                | 1,876008    | 0,247305  | 2,674671  | H                        | -2,035309   | 1,988625  | -0,404669 |
| H                | 2,238779    | -1,012384 | 1,522774  | H                        | -1,293409   | 1,675842  | 1,148542  |
| H                | 1,802908    | 1,961842  | 1,021902  | H                        | -0,072798   | 1,163051  | -1,601160 |
| H                | 3,156864    | 1,013292  | 0,462380  | H                        | 0,558692    | 2,230629  | -0,351401 |
| C                | 2,258095    | -0,922777 | -1,425623 | C                        | 1,308722    | 0,378001  | 1,480046  |
| H                | 1,770048    | -1,518622 | -2,189041 | H                        | 1,847357    | -0,479770 | 1,887558  |
| H                | 1,934899    | -1,276777 | -0,456174 | H                        | 0,486418    | 0,600401  | 2,163089  |
| H                | 3,341152    | -0,994359 | -1,465373 | H                        | 1,987363    | 1,237065  | 1,486894  |
| C                | 2,197222    | 0,703855  | -2,427941 | C                        | 2,026607    | -0,258964 | -0,834850 |
| H                | 1,290223    | 1,025251  | -2,921477 | H                        | 2,545331    | -1,148679 | -0,469705 |
| H                | 2,758456    | 0,092083  | -3,152805 | H                        | 2,750471    | 0,562509  | -0,839262 |

H 2,823796 1,551723 -2,179742 H 1,725075 -0,444339 -1,867977

| 1P C2H6 CH<br>TS |             |           |           | 1P C2H6<br>CH<br>Product |             |           |           |
|------------------|-------------|-----------|-----------|--------------------------|-------------|-----------|-----------|
| 20               |             |           |           | 20                       |             |           |           |
| done:            | -577,787682 |           |           | done:                    | -577,924732 |           |           |
| C                | 0,128163    | 0,664756  | 1,131774  | C                        | -0,445106   | 0,264548  | 0,638600  |
| C                | 1,619224    | 0,697469  | 0,906101  | C                        | 0,685957    | 1,306894  | 0,652543  |
| C                | 2,091832    | -0,382684 | -0,090471 | C                        | 1,583843    | 1,058782  | -0,565946 |
| C                | 1,263163    | -1,646383 | 0,184069  | C                        | 1,874407    | -0,452658 | -0,649672 |
| P                | -0,475571   | -0,972743 | 0,569758  | P                        | 0,395465    | -1,366329 | 0,126862  |
| C                | -0,607343   | 1,991303  | -0,699579 | C                        | -1,602974   | 0,631625  | -0,304976 |
| H                | -0,674387   | -1,510969 | 1,872253  | H                        | 1,003037    | -1,615661 | 1,394289  |
| H                | 1,238729    | -2,320678 | -0,671630 | H                        | 2,012694    | -0,783323 | -1,678917 |
| H                | 1,657603    | -2,197229 | 1,039707  | H                        | 2,778099    | -0,717351 | -0,099832 |
| H                | 1,913550    | -0,037969 | -1,113671 | H                        | 1,068156    | 1,385100  | -1,472830 |
| H                | 3,164105    | -0,577836 | -0,002788 | H                        | 2,508002    | 1,639144  | -0,506999 |
| H                | 1,993226    | 1,696955  | 0,669338  | H                        | 0,288705    | 2,327221  | 0,657298  |
| H                | 2,028480    | 0,457722  | 1,899533  | H                        | 1,275260    | 1,186817  | 1,566592  |
| C                | -2,097230   | 1,926138  | -0,929184 | C                        | -2,823306   | -0,279201 | -0,171142 |
| H                | -0,023963   | 1,410889  | -1,406362 | H                        | -1,259176   | 0,624707  | -1,344709 |
| H                | -0,199639   | 2,999623  | -0,607205 | H                        | -1,901290   | 1,664850  | -0,093256 |
| H                | -2,643502   | 2,519606  | -0,193436 | H                        | -3,226664   | -0,246683 | 0,844688  |
| H                | -2,354641   | 2,305528  | -1,923090 | H                        | -3,618755   | 0,027019  | -0,854011 |
| H                | -2,454613   | 0,895235  | -0,869924 | H                        | -2,570207   | -1,317353 | -0,395535 |
| H                | -0,462244   | 1,636006  | 0,516020  | H                        | -0,852280   | 0,130865  | 1,644489  |

| 1P C2H4 CC<br>TS |             |           |           | 1P C2H4<br>CC<br>Product |             |           |           |
|------------------|-------------|-----------|-----------|--------------------------|-------------|-----------|-----------|
| 18               |             |           |           | 18                       |             |           |           |
| done:            | -576,558649 |           |           | done:                    | -576,680193 |           |           |
| C                | 0,990821    | 0,802983  | -0,665903 | C                        | 0,699201    | 0,022646  | -0,124481 |
| P                | -0,634410   | 0,347435  | -0,008057 | P                        | -0,555021   | -1,291752 | 0,304851  |
| C                | -0,059663   | 0,109516  | 1,786699  | C                        | -1,928187   | 0,017798  | 0,474045  |
| C                | 1,410587    | -0,297638 | 1,598951  | C                        | -1,275006   | 1,404034  | 0,279073  |
| C                | 1,966274    | 0,552967  | 0,436134  | C                        | -0,053583   | 1,240090  | -0,634343 |
| C                | 1,563721    | -0,611576 | -2,545565 | C                        | 2,072827    | -0,333868 | -0,616342 |
| C                | 1,523018    | -1,750680 | -1,840014 | C                        | 1,898748    | 0,204575  | 0,779053  |
| H                | -1,192032   | 1,654978  | -0,014469 | H                        | -0,856117   | -1,659874 | -1,043756 |
| H                | -0,645201   | -0,656059 | 2,294398  | H                        | -2,406507   | -0,067366 | 1,449556  |
| H                | 1,987622    | -0,167448 | 2,518247  | H                        | -1,989508   | 2,127428  | -0,121506 |
| H                | 2,100743    | 1,591067  | 0,796047  | H                        | -0,378923   | 1,065396  | -1,666021 |
| H                | 2,956268    | 0,244087  | 0,091336  | H                        | 0,575079    | 2,135994  | -0,637694 |
| H                | 0,704059    | -0,247983 | -3,089749 | H                        | 2,331527    | -1,379297 | -0,731692 |
| H                | 2,486796    | -0,073340 | -2,709942 | H                        | 2,517342    | 0,316387  | -1,360883 |
| H                | 0,605178    | -2,312805 | -1,721898 | H                        | 2,030562    | -0,479905 | 1,607651  |
| H                | 2,402961    | -2,147316 | -1,347572 | H                        | 2,226063    | 1,218830  | 0,976489  |
| H                | 1,470554    | -1,354701 | 1,321580  | H                        | -0,942052   | 1,786112  | 1,247938  |
| H                | -0,145865   | 1,040956  | 2,349664  | H                        | -2,691485   | -0,175169 | -0,280250 |

| 1P C2H4 CH<br>TS |  |  |  | 1P C2H4<br>CH<br>Product |  |  |  |
|------------------|--|--|--|--------------------------|--|--|--|
| 18               |  |  |  | 18                       |  |  |  |

|                   |           |           |           |                   |           |           |           |
|-------------------|-----------|-----------|-----------|-------------------|-----------|-----------|-----------|
| done: -576,544715 |           |           |           | done: -576,688871 |           |           |           |
| P                 | -0,063737 | 0,996842  | 1,440107  | P                 | -0,411809 | -1,350891 | -0,320507 |
| C                 | 1,712444  | 0,865272  | 0,998205  | C                 | 0,463311  | 0,250399  | -0,863748 |
| C                 | 1,850335  | -0,236839 | -0,016621 | C                 | -0,564892 | 1,372615  | -0,605539 |
| C                 | 0,519272  | -0,542244 | -0,733517 | C                 | -1,221182 | 1,091711  | 0,749778  |
| C                 | -0,598286 | -0,448102 | 0,317491  | C                 | -1,627300 | -0,394216 | 0,787259  |
| C                 | 1,920915  | 2,649695  | -0,463053 | C                 | 1,770418  | 0,511803  | -0,157293 |
| C                 | 1,079097  | 3,663137  | -0,428601 | C                 | 2,469778  | -0,319121 | 0,607642  |
| H                 | 0,085790  | 0,309948  | 2,678804  | H                 | -1,251302 | -1,411731 | -1,472986 |
| H                 | -1,570868 | -0,247643 | -0,130995 | H                 | -1,596564 | -0,797609 | 1,799111  |
| H                 | -0,675791 | -1,369273 | 0,897666  | H                 | -2,638317 | -0,544328 | 0,406910  |
| H                 | 0,356333  | 0,207423  | -1,512870 | H                 | -0,499510 | 1,292359  | 1,545786  |
| H                 | 0,531735  | -1,521430 | -1,219885 | H                 | -2,079178 | 1,745500  | 0,924524  |
| H                 | 2,689893  | -0,091675 | -0,701182 | H                 | -0,093433 | 2,360281  | -0,629281 |
| H                 | 2,124761  | -1,103601 | 0,604971  | H                 | -1,321983 | 1,355549  | -1,394669 |
| H                 | 2,599251  | 2,417868  | -1,276979 | H                 | 2,166868  | 1,513275  | -0,323374 |
| H                 | 0,405934  | 3,812435  | 0,410431  | H                 | 2,140707  | -1,331587 | 0,810234  |
| H                 | 1,019104  | 4,385127  | -1,238175 | H                 | 3,408721  | -0,010304 | 1,050916  |
| H                 | 2,208166  | 2,022128  | 0,568950  | H                 | 0,667331  | 0,173715  | -1,936410 |

| 1P C2H2 CC<br>TS  |           |           |           | 1P C2H2<br>CC<br>Product |           |           |           |
|-------------------|-----------|-----------|-----------|--------------------------|-----------|-----------|-----------|
| 16                |           |           |           | 16                       |           |           |           |
| done: -575,297589 |           |           |           | done: -575,404881        |           |           |           |
| C                 | -0,308074 | 0,357023  | -0,979025 | C                        | 0,743595  | 0,044606  | -0,095880 |
| P                 | 0,461452  | 1,628475  | 0,064771  | P                        | -0,524755 | -1,287727 | 0,355138  |
| C                 | 1,974994  | 0,580946  | 0,540667  | C                        | -1,939240 | -0,017131 | 0,351088  |
| C                 | 1,422189  | -0,850027 | 0,452785  | C                        | -1,283406 | 1,377589  | 0,304520  |
| C                 | 0,482917  | -0,893589 | -0,771723 | C                        | -0,025099 | 1,282058  | -0,562365 |
| C                 | -2,477218 | -0,041516 | -0,338704 | C                        | 2,131762  | -0,284284 | -0,551283 |
| C                 | -2,260672 | -0,331514 | 0,815816  | C                        | 2,045313  | 0,152896  | 0,659300  |
| H                 | 0,950565  | 2,431030  | -1,002606 | H                        | -0,723712 | -1,768577 | -0,976742 |
| H                 | 2,332568  | 0,831081  | 1,539001  | H                        | -2,561690 | -0,141012 | 1,237282  |
| H                 | 2,222489  | -1,591802 | 0,386307  | H                        | -1,982852 | 2,131189  | -0,066232 |
| H                 | 1,102742  | -0,879548 | -1,687894 | H                        | -0,310494 | 1,161650  | -1,614641 |
| H                 | -0,113678 | -1,805442 | -0,844381 | H                        | 0,595423  | 2,179769  | -0,491826 |
| H                 | -2,907791 | 0,174083  | -1,285299 | H                        | 2,732623  | -0,657992 | -1,362826 |
| H                 | -1,997449 | -0,561120 | 1,819267  | H                        | 2,515617  | 0,413265  | 1,591538  |
| H                 | 0,841432  | -1,080471 | 1,351894  | H                        | -0,996467 | 1,679782  | 1,316584  |
| H                 | 2,792805  | 0,733513  | -0,166284 | H                        | -2,572535 | -0,180203 | -0,521480 |

| 1P C2H2 CH<br>TS  |           |           |           | 1P C2H2<br>CH<br>Product |           |           |           |
|-------------------|-----------|-----------|-----------|--------------------------|-----------|-----------|-----------|
| 16                |           |           |           | 16                       |           |           |           |
| done: -575,276825 |           |           |           | done: -575,438341        |           |           |           |
| C                 | 0,409794  | 0,345694  | 1,008875  | C                        | 0,543044  | 0,153656  | -0,545519 |
| C                 | 1,749499  | 0,085950  | 0,368480  | C                        | -0,190907 | 1,431341  | -0,061173 |
| C                 | 1,553247  | -0,612277 | -0,996909 | C                        | -1,679397 | 1,107902  | 0,074361  |
| C                 | 0,311042  | -0,011951 | -1,663784 | C                        | -1,776590 | -0,201231 | 0,863835  |
| P                 | -0,910187 | 0,339885  | -0,270116 | P                        | -0,426589 | -1,344561 | 0,206839  |
| C                 | 0,503404  | 2,573193  | 1,592203  | C                        | 1,953277  | 0,132663  | -0,207669 |
| C                 | 0,678207  | 3,761120  | 1,452691  | C                        | 3,119285  | 0,117238  | 0,085216  |
| H                 | -1,215519 | -1,019281 | 0,060905  | H                        | -1,103552 | -1,676767 | -1,006810 |

|   |           |           |           |   |           |           |           |
|---|-----------|-----------|-----------|---|-----------|-----------|-----------|
| H | 0,536250  | 0,948117  | -2,135314 | H | -1,579193 | -0,027782 | 1,924229  |
| H | -0,120172 | -0,659740 | -2,427766 | H | -2,752226 | -0,683005 | 0,787995  |
| H | 2,445970  | -0,512562 | -1,620020 | H | -2,218304 | 1,922448  | 0,566646  |
| H | 1,393229  | -1,681298 | -0,832666 | H | -2,126024 | 0,976413  | -0,916179 |
| H | 2,268461  | 1,037941  | 0,230127  | H | 0,211550  | 1,720551  | 0,913019  |
| H | 2,375603  | -0,501576 | 1,048043  | H | -0,004933 | 2,261963  | -0,745452 |
| H | 0,348906  | 1,318913  | 1,888240  | H | 0,442768  | 0,068643  | -1,629693 |
| H | 0,816581  | 4,812249  | 1,360178  | H | 4,149819  | 0,097845  | 0,341004  |

| 1P CH3F CF<br>TS |             |           |           | 1P CH3F<br>CF<br>Product |             |           |           |
|------------------|-------------|-----------|-----------|--------------------------|-------------|-----------|-----------|
| 17               |             |           |           | 17                       |             |           |           |
| done:            | -637,686580 |           |           | done:                    | -637,879763 |           |           |
| F                | -0,083290   | 0,148634  | -0,011861 | F                        | -1,125715   | 0,248761  | -1,470301 |
| C                | 0,058888    | -0,452361 | 1,645318  | C                        | -2,120518   | -0,193859 | 0,628058  |
| C                | 1,654212    | 0,318965  | 0,332044  | C                        | -0,812716   | 0,066505  | -0,090901 |
| C                | 1,866559    | 1,772776  | 0,041493  | C                        | -0,053710   | 1,312228  | 0,355750  |
| C                | 2,025968    | 2,013387  | -1,474397 | C                        | 1,350626    | 1,244010  | -0,248060 |
| C                | 2,940250    | 0,903362  | -2,017076 | C                        | 1,912929    | -0,166598 | 0,017430  |
| P                | 2,398403    | -0,649694 | -1,049000 | P                        | 0,444191    | -1,371478 | -0,037838 |
| H                | 3,605382    | -0,925807 | -0,341993 | H                        | 0,326337    | -1,568638 | 1,371004  |
| H                | 3,991934    | 1,127990  | -1,830453 | H                        | 2,389616    | -0,226266 | 0,996412  |
| H                | 2,811372    | 0,748134  | -3,087891 | H                        | 2,654241    | -0,453292 | -0,727802 |
| H                | 2,427595    | 3,007802  | -1,686103 | H                        | 2,004577    | 2,016866  | 0,162187  |
| H                | 1,043149    | 1,952272  | -1,948837 | H                        | 1,283161    | 1,417496  | -1,324034 |
| H                | 2,813834    | 2,013091  | 0,546473  | H                        | 0,003304    | 1,311807  | 1,448446  |
| H                | 1,103056    | 2,406249  | 0,499458  | H                        | -0,596800   | 2,211075  | 0,050590  |
| H                | 0,629881    | -1,363481 | 1,711528  | H                        | -2,606852   | -1,089206 | 0,238969  |
| H                | -1,015679   | -0,603841 | 1,590987  | H                        | -2,797572   | 0,651434  | 0,482044  |
| H                | 0,364587    | 0,308975  | 2,344172  | H                        | -1,955647   | -0,325062 | 1,698236  |

| 1P CH3F CH<br>TS |             |           |           | 1P CH3F<br>CH<br>Product |             |           |           |
|------------------|-------------|-----------|-----------|--------------------------|-------------|-----------|-----------|
| 17               |             |           |           | 17                       |             |           |           |
| done:            | -637,727523 |           |           | done:                    | -637,874358 |           |           |
| C                | 1,468918    | -0,471179 | 0,641488  | C                        | -0,030984   | 1,120198  | 0,768035  |
| C                | 1,299633    | 0,707735  | -0,339729 | C                        | 0,880992    | 1,444193  | -0,420397 |
| C                | 0,075708    | 0,401138  | -1,216369 | C                        | 1,921838    | 0,318283  | -0,546875 |
| P                | -1,156817   | -0,389367 | -0,005650 | P                        | 1,064552    | -1,293049 | -0,014319 |
| C                | 0,149891    | -1,014413 | 1,118524  | C                        | -0,455134   | -0,353975 | 0,656378  |
| C                | -0,195552   | 0,420520  | 2,979208  | C                        | -1,632227   | -0,580066 | -0,274691 |
| F                | 1,011359    | 0,638084  | 3,593541  | F                        | -2,769992   | 0,094825  | 0,204963  |
| H                | -1,412241   | -1,633042 | -0,648664 | H                        | 1,705598    | -1,429473 | 1,251065  |
| H                | -0,345134   | 1,297964  | -1,670023 | H                        | 2,296090    | 0,219495  | -1,565635 |
| H                | 0,327702    | -0,298186 | -2,015319 | H                        | 2,779060    | 0,497197  | 0,102713  |
| H                | 1,129377    | 1,627967  | 0,227573  | H                        | 0,286489    | 1,500686  | -1,336717 |
| H                | 2,195738    | 0,868807  | -0,944538 | H                        | 1,361104    | 2,418688  | -0,303112 |
| H                | 2,159520    | -0,259285 | 1,460914  | H                        | -0,901549   | 1,779357  | 0,808043  |
| H                | 1,907530    | -1,325143 | 0,101922  | H                        | 0,522170    | 1,259627  | 1,701099  |
| H                | -0,086288   | -0,704180 | 2,345357  | H                        | -0,715555   | -0,767440 | 1,632508  |
| H                | -0,494334   | 1,284789  | 2,395775  | H                        | -1,443021   | -0,202479 | -1,283148 |
| H                | -0,946879   | 0,111156  | 3,708979  | H                        | -1,889537   | -1,638762 | -0,337180 |

| 1P CH3CI<br>CCI TS |             |           |           | 1P CH3CI<br>CCI<br>Product |             |           |           |
|--------------------|-------------|-----------|-----------|----------------------------|-------------|-----------|-----------|
| 17                 |             |           |           | 17                         |             |           |           |
| done:              | -998,037141 |           |           | done:                      | -998,220138 |           |           |
| Cl                 | -0,518631   | 0,089573  | -0,148258 | Cl                         | 1,310328    | -0,500730 | -1,375499 |
| C                  | 0,067495    | -0,551071 | 1,915115  | C                          | 1,744058    | 0,641213  | 1,071379  |
| C                  | 1,701010    | 0,275651  | 0,469703  | C                          | 0,594304    | 0,096321  | 0,243541  |
| C                  | 1,918714    | 1,729300  | 0,199773  | C                          | -0,159562   | -1,070353 | 0,881773  |
| C                  | 2,135911    | 1,995945  | -1,302901 | C                          | -1,456910   | -1,299675 | 0,103497  |
| C                  | 3,028545    | 0,867791  | -1,849639 | C                          | -2,103317   | 0,071812  | -0,194208 |
| P                  | 2,510608    | -0,692280 | -0,872398 | P                          | -0,730583   | 1,383543  | -0,211207 |
| H                  | 3,698041    | -0,876948 | -0,098907 | H                          | -0,906071   | 1,807097  | 1,144097  |
| H                  | 4,086422    | 1,078581  | -1,684194 | H                          | -2,834619   | 0,348157  | 0,565843  |
| H                  | 2,880073    | 0,706391  | -2,916794 | H                          | -2,617282   | 0,071352  | -1,154724 |
| H                  | 2,578644    | 2,980112  | -1,476442 | H                          | -2,139248   | -1,948844 | 0,656465  |
| H                  | 1,166145    | 1,982287  | -1,805241 | H                          | -1,222669   | -1,804094 | -0,834893 |
| H                  | 2,859661    | 1,929406  | 0,739800  | H                          | -0,388124   | -0,778200 | 1,912914  |
| H                  | 1,162819    | 2,375495  | 0,650538  | H                          | 0,462202    | -1,967780 | 0,924853  |
| H                  | 0,699034    | -1,422947 | 1,909642  | H                          | 2,239974    | 1,471538  | 0,568859  |
| H                  | -0,988358   | -0,761945 | 2,015142  | H                          | 2,486645    | -0,137731 | 1,254886  |
| H                  | 0,420600    | 0,259685  | 2,529961  | H                          | 1,369378    | 0,994092  | 2,035523  |

| 1P CH3CI<br>CH TS |             |           |           | 1P CH3CI<br>CH<br>Product |             |           |           |
|-------------------|-------------|-----------|-----------|---------------------------|-------------|-----------|-----------|
| 17                |             |           |           | 17                        |             |           |           |
| done:             | -998,070400 |           |           | done:                     | -998,218754 |           |           |
| C                 | 0,405088    | -1,188514 | 1,109808  | C                         | -1,139868   | -0,662502 | -0,343646 |
| C                 | 1,642318    | -0,505180 | 0,597068  | Cl                        | -2,737299   | 0,077168  | 0,184711  |
| C                 | 1,298395    | 0,670073  | -0,350716 | C                         | -0,015211   | -0,366956 | 0,633909  |
| C                 | 0,089064    | 0,266633  | -1,215111 | P                         | 1,555994    | -1,282792 | 0,036822  |
| P                 | -0,813347   | -1,103181 | -0,250501 | C                         | 2,383464    | 0,336163  | -0,518598 |
| C                 | -0,315312   | 0,374407  | 2,780712  | C                         | 1,312061    | 1,437563  | -0,443566 |
| Cl                | 0,908871    | 0,743841  | 4,020262  | C                         | 0,378743    | 1,115777  | 0,728832  |
| H                 | -1,856281   | -0,390122 | 0,405084  | H                         | 2,157393    | -1,359336 | 1,327101  |
| H                 | -0,564638   | 1,106118  | -1,451594 | H                         | 2,783250    | 0,221401  | -1,525909 |
| H                 | 0,408670    | -0,172209 | -2,161749 | H                         | 3,221102    | 0,553140  | 0,144807  |
| H                 | 1,045440    | 1,542904  | 0,256169  | H                         | 0,739664    | 1,460349  | -1,375459 |
| H                 | 2,154049    | 0,953149  | -0,968988 | H                         | 1,763885    | 2,426448  | -0,335215 |
| H                 | 2,308685    | -0,209410 | 1,409619  | H                         | -0,502975   | 1,760584  | 0,739299  |
| H                 | 2,180756    | -1,288003 | 0,040497  | H                         | 0,908754    | 1,279156  | 1,671229  |
| H                 | 0,047064    | -0,796439 | 2,258343  | H                         | -0,293114   | -0,768750 | 1,609157  |
| H                 | -0,420241   | 1,204416  | 2,094818  | H                         | -0,952149   | -0,261450 | -1,337579 |
| H                 | -1,254347   | 0,085023  | 3,246849  | H                         | -1,330941   | -1,728857 | -0,422826 |
